# Supplementary material for: A Comprehensive Evaluation of Cross-Omics Blood-Based Biomarkers for Neuropsychiatric Disorders
Source: J Pers Med. 2021 Nov 24;11(12):1247. doi: 10.3390/jpm11121247 (PMC8703948; doi:10.3390/jpm11121247)
Supplement: Supplementary file 1 [file jpm-11-01247-s001.zip]

Archive with 9 entries (9 files):
- 20210314_Supplementary materials.pdf
- Table S1.csv
- Table S10.xlsx
- Table S11.csv
- Table S2.csv
- Table S3.csv
- Table S4.csv
- Table S5.csv
- Table S8.csv
