# Supplementary material for: A Comprehensive Evaluation of Cross-Omics Blood-Based Biomarkers for Neuropsychiatric Disorders
Source: J Pers Med. 2021 Nov 24;11(12):1247. doi: 10.3390/jpm11121247 (PMC8703948; doi:10.3390/jpm11121247)
Supplement: Supplementary file 1 [file jpm-11-01247-s001.zip › Table S1.csv]

	disease	gene	b	se	p	pHEIDI	filter	omic	symbol
1	SCZ	ENSG00000186470	0.122104	0.0115219	7.62E-40	5.96E-14	0	RNA	BTN3A2
2	SCZ	ENSG00000158373	0.046428	0.0138845	3.93E-27	3.76E-22	0	RNA	H2BC5
3	SCZ	ENSG00000187626	-0.493154	0.0521046	4.47E-25	3.10E-09	0	RNA	ZKSCAN4
4	SCZ	ENSG00000197062	0.212482	0.031128	1.10E-24	8.20E-07	0	RNA	ZSCAN26
5	SCZ	ENSG00000196812	-0.618561	0.0688284	1.53E-24	1.40E-09	0	RNA	ZSCAN16
6	SCZ	ENSG00000124508	-0.275964	0.0377089	2.84E-24	2.46E-15	0	RNA	BTN2A2
7	SCZ	ENSG00000112763	0.00889924	0.0215833	1.34E-23	7.36E-18	0	RNA	BTN2A1
8	SCZ	ENSG00000112812	-0.416185	0.0425854	1.66E-23	0.000459445	0	RNA	PRSS16
9	SCZ	ENSG00000197903	0.0354322	0.029197	6.05E-23	1.43E-24	0	RNA	H2BC12
10	SCZ	ENSG00000137185	0.0362451	0.0217937	3.96E-22	3.60E-11	0	RNA	ZSCAN9
11	SCZ	ENSG00000158406	-0.124031	0.0229726	5.76E-22	1.55E-10	0	RNA	H4C8
12	SCZ	ENSG00000182952	0.0744535	0.0200737	2.50E-21	1.87E-17	0	RNA	HMGN4
13	SCZ	ENSG00000261584	-0.0225146	0.0124015	1.12E-20	5.41E-15	0	RNA	NA
14	SCZ	ENSG00000189298	-0.418084	0.045292	2.13E-20	5.60E-14	0	RNA	ZKSCAN3
15	SCZ	ENSG00000228223	0.107225	0.0295031	8.11E-20	4.10E-20	0	RNA	HCG11
16	SCZ	ENSG00000219891	-0.159462	0.0226121	1.45E-19	9.91E-11	0	RNA	NA
17	SCZ	ENSG00000204789	-0.0766097	0.0461135	1.58E-19	0.000154828	0	RNA	NA
18	SCZ	ENSG00000137338	-0.541661	0.0778521	6.59E-19	1.15E-09	0	RNA	PGBD1
19	SCZ	ENSG00000168405	-0.0462492	0.0153145	8.14E-19	0.00016507	0	RNA	CMAHP
20	SCZ	ENSG00000124613	-0.179145	0.0349514	4.78E-18	1.77E-18	0	RNA	ZNF391
21	SCZ	ENSG00000026950	-0.160875	0.0277363	6.04E-18	5.10E-13	0	RNA	BTN3A1
22	SCZ	ENSG00000219392	0.191929	0.028433	3.34E-16	1.80E-08	0	RNA	NA
23	SCZ	ENSG00000101442	0.118993	0.0218595	4.62E-16	5.87E-09	0	RNA	ACTR5
24	SCZ	ENSG00000188641	-0.170266	0.0356194	5.87E-16	0.1327709	1	RNA	DPYD
25	SCZ	ENSG00000183172	0.0759244	0.0127473	5.54E-15	2.65E-05	0	RNA	SMDT1
26	SCZ	ENSG00000197279	-0.980272	0.151877	1.18E-14	0.000232329	0	RNA	ZNF165
27	SCZ	ENSG00000197914	0.0425198	0.0340396	1.67E-14	0.4543518	1	RNA	NA
28	SCZ	ENSG00000126214	0.181231	0.0269284	1.46E-13	0.001883628	0	RNA	KLC1
29	SCZ	ENSG00000030110	-0.095173	0.0170736	1.57E-13	2.62E-05	0	RNA	BAK1
30	SCZ	ENSG00000100197	-0.176983	0.0321674	2.21E-13	0.000136566	0	RNA	CYP2D6
31	SCZ	ENSG00000198951	0.255777	0.0424608	2.66E-13	0.03499136	0	RNA	NAGA
32	SCZ	ENSG00000096433	0.0794075	0.0210838	2.69E-13	5.88E-06	0	RNA	ITPR3
33	SCZ	ENSG00000173915	-0.0502719	0.0162038	7.82E-13	5.27E-06	0	RNA	ATP5MD
34	SCZ	ENSG00000002822	0.211075	0.0391382	9.23E-13	0.00017913	0	RNA	MAD1L1
35	SCZ	ENSG00000124549	-0.345953	0.118247	1.14E-12	3.84E-05	0	RNA	BTN2A3P
36	SCZ	ENSG00000226124	-0.00614886	0.011755	1.23E-12	1.85E-07	0	RNA	FTCDNL1
37	SCZ	ENSG00000055955	-0.100874	0.0181786	1.31E-12	0.000598465	0	RNA	ITIH4
38	SCZ	ENSG00000150967	0.245756	0.0362675	1.57E-12	0.2347354	1	RNA	ABCB9
39	SCZ	ENSG00000197846	-0.195866	0.0472021	1.70E-12	7.86E-10	0	RNA	NA
40	SCZ	ENSG00000166275	0.0592239	0.0164416	2.15E-12	1.15E-10	0	RNA	BORCS7
41	SCZ	ENSG00000177096	0.22209	0.0377356	2.52E-12	0.001141985	0	RNA	PHETA2
42	SCZ	ENSG00000156414	-0.0494406	0.0187927	2.64E-12	2.42E-08	0	RNA	TDRD9
43	SCZ	ENSG00000146109	-0.280907	0.0783085	2.66E-12	6.14E-14	0	RNA	ABT1
44	SCZ	ENSG00000124564	-0.0793048	0.0324404	3.39E-12	8.42E-05	0	RNA	SLC17A3
45	SCZ	ENSG00000120451	0.0729901	0.0153631	3.49E-12	0.003044976	0	RNA	SNX19
46	SCZ	ENSG00000214435	0.156456	0.0195847	6.32E-12	9.81E-09	0	RNA	AS3MT
47	SCZ	ENSG00000122687	-0.265446	0.0536293	8.11E-12	0.000477227	0	RNA	MRM2
48	SCZ	ENSG00000183955	0.0975589	0.0164753	8.96E-12	2.10E-07	0	RNA	KMT5A
49	SCZ	ENSG00000156398	0.134122	0.0367903	1.11E-11	1.46E-09	0	RNA	SFXN2
50	SCZ	ENSG00000168237	0.140698	0.0248432	1.88E-11	0.002583161	0	RNA	GLYCTK
51	SCZ	ENSG00000205702	0.099007	0.016315	1.99E-11	4.07E-06	0	RNA	CYP2D7
52	SCZ	ENSG00000124693	-0.253745	0.0742502	2.21E-11	0.000176929	0	RNA	NA
53	SCZ	ENSG00000231621	0.0668649	0.0102974	2.31E-11	0.07282731	1	RNA	ANKRD44-AS1
54	SCZ	ENSG00000182196	-0.354022	0.0534	2.86E-11	0.06101615	1	RNA	ARL6IP4
55	SCZ	ENSG00000101445	0.528385	0.0796238	3.25E-11	2.92E-06	0	RNA	PPP1R16B
56	SCZ	ENSG00000111231	0.0908876	0.0140511	3.79E-11	0.00012736	0	RNA	GPN3
57	SCZ	ENSG00000126215	0.0739432	0.0389449	3.84E-11	1.01E-07	0	RNA	XRCC3
58	SCZ	ENSG00000168268	0.104899	0.0256988	4.38E-11	1.90E-08	0	RNA	NT5DC2
59	SCZ	ENSG00000164088	0.144447	0.025751	5.17E-11	0.004434079	0	RNA	PPM1M
60	SCZ	ENSG00000198518	-0.352214	0.0668097	5.53E-11	3.09E-11	0	RNA	NA
61	SCZ	ENSG00000269958	0.0402656	0.0163453	5.85E-11	1.23E-06	0	RNA	NA
62	SCZ	ENSG00000138111	-0.166637	0.0314614	7.63E-11	1.95E-07	0	RNA	MFSD13A
63	SCZ	ENSG00000196141	0.194791	0.0557461	8.05E-11	3.10E-05	0	RNA	SPATS2L
64	SCZ	ENSG00000167074	0.0601356	0.0216523	1.08E-10	4.25E-13	0	RNA	TEF
65	SCZ	ENSG00000166165	0.151205	0.0488582	1.23E-10	0.008532691	0	RNA	CKB
66	SCZ	ENSG00000226314	-0.329311	0.0522859	1.72E-10	4.11E-07	0	RNA	ZNF192P1
67	SCZ	ENSG00000181315	-0.0791697	0.0229829	1.87E-10	2.63E-19	0	RNA	ZNF322
68	SCZ	ENSG00000076685	-0.252559	0.0305291	1.95E-10	0.00113942	0	RNA	NT5C2
69	SCZ	ENSG00000161904	-0.0901362	0.0567146	2.40E-10	2.35E-05	0	RNA	LEMD2
70	SCZ	ENSG00000106268	0.171167	0.0469027	2.69E-10	9.28E-05	0	RNA	NUDT1
71	SCZ	ENSG00000111328	0.0338331	0.0210424	2.99E-10	2.66E-09	0	RNA	CDK2AP1
72	SCZ	ENSG00000066735	0.0504993	0.0572078	4.83E-10	4.68E-08	0	RNA	KIF26A
73	SCZ	ENSG00000138107	-0.207797	0.0665269	4.90E-10	2.01E-07	0	RNA	ACTR1A
74	SCZ	ENSG00000255455	0.22796	0.0491023	4.91E-10	6.72E-05	0	RNA	LOC103611081
75	SCZ	ENSG00000204856	0.179555	0.0280424	5.18E-10	0.2030382	1	RNA	FAM216A
76	SCZ	ENSG00000269940	0.0712652	0.0291759	5.27E-10	3.83E-06	0	RNA	NA
77	SCZ	ENSG00000166166	0.250609	0.0485881	5.70E-10	0.000521405	0	RNA	TRMT61A
78	SCZ	ENSG00000114902	-0.233537	0.0504243	6.11E-10	1.39E-06	0	RNA	SPCS1
79	SCZ	ENSG00000167077	0.0272563	0.0223093	8.15E-10	1.16E-14	0	RNA	MEI1
80	SCZ	ENSG00000243224	0.1879	0.033836	9.02E-10	0.001735875	0	RNA	LOC101929054
81	SCZ	ENSG00000051825	0.21564	0.0436307	1.03E-09	6.38E-05	0	RNA	MPHOSPH9
82	SCZ	ENSG00000114054	-0.144042	0.0221658	1.06E-09	0.5143239	1	RNA	PCCB
83	SCZ	ENSG00000054282	-0.102145	0.0190821	1.13E-09	0.00021677	0	RNA	SDCCAG8
84	SCZ	ENSG00000166170	0.397409	0.0590343	1.14E-09	4.39E-05	0	RNA	BAG5
85	SCZ	ENSG00000100664	-0.0909119	0.0205697	1.16E-09	0.6353246	1	RNA	EIF5
86	SCZ	ENSG00000163931	-0.0299258	0.015444	1.22E-09	2.64E-06	0	RNA	TKT
87	SCZ	ENSG00000213533	-0.119874	0.0400897	1.35E-09	5.21E-06	0	RNA	STIMATE
88	SCZ	ENSG00000111237	-0.0783898	0.030519	1.39E-09	1.23E-10	0	RNA	VPS29
89	SCZ	ENSG00000128268	0.107882	0.0301781	1.85E-09	0.000991026	0	RNA	MGAT3
90	SCZ	ENSG00000019102	-0.629029	0.121185	2.13E-09	0.03627146	0	RNA	VSIG2
91	SCZ	ENSG00000096654	0.322859	0.0678367	2.27E-09	5.36E-18	0	RNA	ZNF184
92	SCZ	ENSG00000163938	0.424111	0.0731502	2.57E-09	0.03737143	0	RNA	GNL3
93	SCZ	ENSG00000171206	0.0281401	0.0407497	2.58E-09	2.61E-07	0	RNA	TRIM8
94	SCZ	ENSG00000159958	-0.13721	0.0704208	2.77E-09	0.7897988	1	RNA	TNFRSF13C
95	SCZ	ENSG00000241549	-0.0431516	0.0238288	3.28E-09	0.000457056	0	RNA	GUSBP2
96	SCZ	ENSG00000065413	0.326864	0.101436	3.37E-09	0.08585328	1	RNA	ANKRD44
97	SCZ	ENSG00000256092	-0.102076	0.022577	3.48E-09	1.28E-06	0	RNA	NA
98	SCZ	ENSG00000156232	-0.0849404	0.0387169	3.73E-09	0.000646313	0	RNA	WHAMM
99	SCZ	ENSG00000261353	0.108245	0.0298836	3.96E-09	2.96E-17	0	RNA	NA
100	SCZ	ENSG00000242142	0.0110554	0.0125213	4.13E-09	2.49E-12	0	RNA	NA
101	SCZ	ENSG00000049167	0.0987398	0.0361837	4.21E-09	2.60E-05	0	RNA	ERCC8
102	SCZ	ENSG00000142546	-0.341279	0.0621259	4.37E-09	0.4059887	1	RNA	NOSIP
103	SCZ	ENSG00000115896	0.100713	0.0198384	4.47E-09	1.09E-05	0	RNA	PLCL1
104	SCZ	ENSG00000010327	0.0354941	0.029428	5.18E-09	0.01069894	0	RNA	STAB1
105	SCZ	ENSG00000224997	-0.0945773	0.0200218	5.43E-09	1.50E-11	0	RNA	NA
106	SCZ	ENSG00000247626	-0.22212	0.0479459	5.57E-09	1.05E-06	0	RNA	MARS2
107	SCZ	ENSG00000163935	-0.332262	0.0903871	5.80E-09	0.003054592	0	RNA	SFMBT1
108	SCZ	ENSG00000120915	0.00323069	0.020092	6.41E-09	0.001191123	0	RNA	EPHX2
109	SCZ	ENSG00000182511	0.163278	0.0291709	6.43E-09	0.06398139	1	RNA	FES
110	SCZ	ENSG00000111229	0.278565	0.046201	6.78E-09	0.3563973	1	RNA	ARPC3
111	SCZ	ENSG00000100321	0.0291997	0.0176462	7.01E-09	0.02571116	0	RNA	SYNGR1
112	SCZ	ENSG00000162267	-0.605051	0.0988627	7.06E-09	0.1633757	1	RNA	ITIH3
113	SCZ	ENSG00000115524	0.479021	0.0828824	7.70E-09	0.06947182	1	RNA	SF3B1
114	SCZ	ENSG00000126456	-0.250754	0.0402705	8.07E-09	0.000675717	0	RNA	IRF3
115	SCZ	ENSG00000079691	-0.00470996	0.0154912	8.34E-09	4.32E-05	0	RNA	CARMIL1
116	SCZ	ENSG00000138030	-0.0791968	0.0212726	1.04E-08	0.008405246	0	RNA	KHK
117	SCZ	ENSG00000226450	0.0161173	0.021801	1.06E-08	2.29E-09	0	RNA	NA
118	SCZ	ENSG00000100138	-0.150576	0.0427774	1.14E-08	0.00999444	0	RNA	SNU13
119	SCZ	ENSG00000104870	0.134055	0.0467973	1.27E-08	1.75E-05	0	RNA	FCGRT
120	SCZ	ENSG00000250067	-0.231612	0.0530724	1.30E-08	6.12E-07	0	RNA	YJEFN3
121	SCZ	ENSG00000163933	-0.0267655	0.0320781	1.37E-08	1.90E-11	0	RNA	RFT1
122	SCZ	ENSG00000154146	-0.496362	0.129395	1.41E-08	0.001279975	0	RNA	NRGN
123	SCZ	ENSG00000028116	0.0142492	0.0358503	1.49E-08	1.22E-11	0	RNA	VRK2
124	SCZ	ENSG00000196510	-0.57629	0.106612	1.76E-08	0.4929488	1	RNA	ANAPC7
125	SCZ	ENSG00000154016	0.166035	0.0313699	1.84E-08	0.2679914	1	RNA	GRAP
126	SCZ	ENSG00000159214	0.0655609	0.0175328	1.90E-08	0.004329911	0	RNA	CCDC24
127	SCZ	ENSG00000100346	0.211829	0.074554	1.91E-08	2.20E-05	0	RNA	CACNA1I
128	SCZ	ENSG00000237037	-0.208685	0.0436764	1.92E-08	0.003475269	0	RNA	NDUFA6-DT
129	SCZ	ENSG00000100147	0.117024	0.0331422	2.02E-08	0.000870099	0	RNA	CCDC134
130	SCZ	ENSG00000149923	0.224307	0.048245	2.03E-08	0.001720859	0	RNA	PPP4C
131	SCZ	ENSG00000142552	0.0928361	0.0330394	2.11E-08	3.93E-07	0	RNA	RCN3
132	SCZ	ENSG00000237513	0.0941127	0.018799	2.20E-08	0.01501662	0	RNA	NA
133	SCZ	ENSG00000184983	0.0340138	0.0286697	2.29E-08	2.86E-09	0	RNA	NDUFA6
134	SCZ	ENSG00000103723	-0.109591	0.02809	2.37E-08	0.03648254	0	RNA	AP3B2
135	SCZ	ENSG00000085788	-0.283625	0.0525569	2.42E-08	0.06348925	1	RNA	DDHD2
136	SCZ	ENSG00000168016	0.0810251	0.0327267	2.42E-08	4.39E-06	0	RNA	TRANK1
137	SCZ	ENSG00000129933	-0.0367483	0.0133799	2.50E-08	1.47E-06	0	RNA	MAU2
138	SCZ	ENSG00000188659	-0.0285625	0.019482	2.66E-08	0.000341943	0	RNA	SAXO2
139	SCZ	ENSG00000156411	0.0652262	0.0433538	2.95E-08	0.01020706	0	RNA	ATP5MPL
140	SCZ	ENSG00000259785	0.017907	0.0121339	3.25E-08	7.70E-06	0	RNA	NA
141	SCZ	ENSG00000090238	-0.168295	0.0394691	3.31E-08	0.000184482	0	RNA	YPEL3
142	SCZ	ENSG00000213277	-0.606794	0.0892788	3.32E-08	0.04808687	0	RNA	NA
143	SCZ	ENSG00000138172	-0.0437562	0.0474454	3.92E-08	9.77E-08	0	RNA	CALHM2
144	SCZ	ENSG00000151164	-0.181948	0.0620559	3.95E-08	7.98E-07	0	RNA	RAD9B
145	SCZ	ENSG00000250616	-0.0999093	0.0240126	4.24E-08	0.000349714	0	RNA	NA
146	SCZ	ENSG00000168274	0.00214307	0.0333112	4.84E-08	0.000124633	0	RNA	NA
147	SCZ	ENSG00000243628	-0.00481675	0.0131265	4.99E-08	2.40E-05	0	RNA	NA
148	SCZ	ENSG00000178093	0.289018	0.0685833	5.04E-08	6.59E-06	0	RNA	TSSK6
149	SCZ	ENSG00000016864	0.381519	0.0856385	5.11E-08	0.000510556	0	RNA	GLT8D1
150	SCZ	ENSG00000167491	0.139236	0.0206187	5.12E-08	0.2250557	1	RNA	GATAD2A
151	SCZ	ENSG00000255398	-0.0504277	0.0253406	5.38E-08	0.002407873	0	RNA	HCAR3
152	SCZ	ENSG00000156735	0.238679	0.0473826	5.39E-08	0.02014367	0	RNA	BAG4
153	SCZ	ENSG00000122490	0.0784881	0.0249655	5.45E-08	0.006577704	0	RNA	SLC66A2
154	SCZ	ENSG00000262319	0.0801385	0.0174102	5.50E-08	0.1428031	1	RNA	NA
155	SCZ	ENSG00000120733	-0.0205832	0.0369718	5.94E-08	4.57E-05	0	RNA	KDM3B
156	SCZ	ENSG00000180573	0.429957	0.144508	6.05E-08	2.90E-06	0	RNA	H2AC6
157	SCZ	ENSG00000169592	0.219135	0.0319675	6.24E-08	0.1499778	1	RNA	INO80E
158	SCZ	ENSG00000260655	-0.0720698	0.037336	6.31E-08	0.000578003	0	RNA	NA
159	SCZ	ENSG00000103037	-0.245617	0.0530559	6.60E-08	2.92E-05	0	RNA	SETD6
160	SCZ	ENSG00000166888	-0.0930785	0.0210152	6.98E-08	0.000309413	0	RNA	STAT6
161	SCZ	ENSG00000088808	-0.647901	0.165848	7.05E-08	0.01796009	0	RNA	PPP1R13B
162	SCZ	ENSG00000228157	-0.0673585	0.0142333	7.18E-08	0.005969056	0	RNA	NA
163	SCZ	ENSG00000122986	0.214306	0.0549029	7.45E-08	0.003340171	0	RNA	HVCN1
164	SCZ	ENSG00000128482	-0.180337	0.0383054	8.00E-08	0.01518959	0	RNA	RNF112
165	SCZ	ENSG00000135250	0.406476	0.081978	8.11E-08	0.00093925	0	RNA	SRPK2
166	SCZ	ENSG00000184068	0.0486783	0.0162026	8.61E-08	0.000356437	0	RNA	SREBF2-AS1
167	SCZ	ENSG00000154447	0.171061	0.0388449	8.68E-08	0.007616443	0	RNA	SH3RF1
168	SCZ	ENSG00000143702	-0.162719	0.0317852	9.28E-08	1.55E-05	0	RNA	CEP170
169	SCZ	ENSG00000117020	-0.64271	0.113982	9.36E-08	0.04296806	0	RNA	AKT3
170	SCZ	ENSG00000117410	0.131669	0.0482458	9.46E-08	3.97E-05	0	RNA	ATP6V0B
171	SCZ	ENSG00000269910	0.298141	0.0522152	9.61E-08	0.000342449	0	RNA	NA
172	SCZ	ENSG00000041357	0.222681	0.0556374	9.99E-08	0.007516223	0	RNA	PSMA4
173	SCZ	ENSG00000147548	0.364208	0.0638574	1.06E-07	0.7815937	1	RNA	NSD3
174	SCZ	ENSG00000064547	-0.106443	0.0191402	1.09E-07	0.000182372	0	RNA	LPAR2
175	SCZ	ENSG00000184903	-0.110764	0.0186254	1.15E-07	0.04619258	0	RNA	IMMP2L
176	SCZ	ENSG00000100417	-0.034733	0.0392563	1.18E-07	1.03E-12	0	RNA	PMM1
177	SCZ	ENSG00000167720	-0.032721	0.0179432	1.20E-07	6.87E-08	0	RNA	SRR
178	SCZ	ENSG00000112343	0.104607	0.0366607	1.33E-07	1.11E-13	0	RNA	TRIM38
179	SCZ	ENSG00000156599	0.230962	0.0415313	1.34E-07	0.9093503	1	RNA	ZDHHC5
180	SCZ	ENSG00000166881	0.0870761	0.0585232	1.36E-07	0.3681599	1	RNA	NEMP1
181	SCZ	ENSG00000080854	-0.0919647	0.0643624	1.49E-07	0.000141072	0	RNA	IGSF9B
182	SCZ	ENSG00000164574	-0.0148115	0.0514685	1.63E-07	0.000235411	0	RNA	GALNT10
183	SCZ	ENSG00000103034	0.408176	0.0906833	1.65E-07	0.007210296	0	RNA	NDRG4
184	SCZ	ENSG00000100395	0.0678175	0.0350723	1.73E-07	1.37E-05	0	RNA	L3MBTL2
185	SCZ	ENSG00000142541	-0.130717	0.0430928	1.74E-07	4.66E-07	0	RNA	RPL13A
186	SCZ	ENSG00000183604	0.0530029	0.0172074	1.75E-07	1.96E-05	0	RNA	SMG1P5
187	SCZ	ENSG00000250661	-0.253364	0.0450776	1.77E-07	0.4480734	1	RNA	NA
188	SCZ	ENSG00000149922	-0.275961	0.0657421	1.85E-07	0.001395158	0	RNA	TBX6
189	SCZ	ENSG00000263463	-0.0883504	0.0457807	1.89E-07	0.001782561	0	RNA	NA
190	SCZ	ENSG00000166503	0.00853432	0.023513	1.99E-07	0.000308928	0	RNA	HDGFL3
191	SCZ	ENSG00000174943	-0.649795	0.120597	2.00E-07	0.0892797	1	RNA	KCTD13
192	SCZ	ENSG00000163131	0.0364438	0.0362133	2.08E-07	0.03378429	0	RNA	CTSS
193	SCZ	ENSG00000149131	0.155484	0.0356891	2.28E-07	0.007257979	0	RNA	SERPING1
194	SCZ	ENSG00000186010	0.29912	0.0700059	2.29E-07	0.000264269	0	RNA	NDUFA13
195	SCZ	ENSG00000111801	0.0276599	0.0852354	2.35E-07	0.7965071	1	RNA	BTN3A3
196	SCZ	ENSG00000130921	0.482973	0.119727	2.56E-07	0.000413703	0	RNA	C12orf65
197	SCZ	ENSG00000155729	-0.139205	0.0839821	2.62E-07	0.05634794	1	RNA	KCTD18
198	SCZ	ENSG00000115541	0.633839	0.114057	2.83E-07	0.01320272	0	RNA	HSPE1
199	SCZ	ENSG00000143401	-0.377607	0.0655779	3.03E-07	0.007109878	0	RNA	ANP32E
200	SCZ	ENSG00000164181	-0.0760304	0.0438224	3.04E-07	0.000123026	0	RNA	ELOVL7
201	SCZ	ENSG00000254918	-0.380738	0.0855331	3.09E-07	0.01144166	0	RNA	NA
202	SCZ	ENSG00000100393	0.257114	0.0443914	3.13E-07	0.01562682	0	RNA	EP300
203	SCZ	ENSG00000137601	0.161571	0.0340145	3.52E-07	0.002680203	0	RNA	NEK1
204	SCZ	ENSG00000269963	-0.0690931	0.0145839	3.95E-07	3.03E-12	0	RNA	NA
205	SCZ	ENSG00000139697	0.221541	0.117771	3.97E-07	0.000915838	0	RNA	SBNO1
206	SCZ	ENSG00000242797	0.20145	0.0395005	4.00E-07	0.0589528	1	RNA	NA
207	SCZ	ENSG00000150625	-0.0205427	0.0339469	4.01E-07	5.76E-05	0	RNA	GPM6A
208	SCZ	ENSG00000260114	0.291932	0.0706246	4.02E-07	0.0469548	0	RNA	NA
209	SCZ	ENSG00000065833	0.798023	0.139703	4.10E-07	0.008370927	0	RNA	ME1
210	SCZ	ENSG00000136381	-0.0765742	0.0200955	4.23E-07	1.57E-07	0	RNA	IREB2
211	SCZ	ENSG00000254941	-0.0603579	0.0246147	4.62E-07	8.64E-07	0	RNA	NA
212	SCZ	ENSG00000166484	0.426837	0.094559	4.64E-07	0.01601537	0	RNA	MAPK7
213	SCZ	ENSG00000149182	0.324643	0.103681	4.66E-07	0.002126082	0	RNA	ARFGAP2
214	SCZ	ENSG00000198315	-0.921239	0.199166	4.77E-07	0.001776022	0	RNA	ZKSCAN8
215	SCZ	ENSG00000116127	0.122023	0.0239129	4.88E-07	0.06947197	1	RNA	ALMS1
216	SCZ	ENSG00000102882	0.0886661	0.0207905	4.90E-07	0.06259324	1	RNA	MAPK3
217	SCZ	ENSG00000137841	-0.148608	0.0434374	5.07E-07	0.01854278	0	RNA	PLCB2
218	SCZ	ENSG00000120709	0.441788	0.0895855	5.09E-07	0.1159109	1	RNA	FAM53C
219	SCZ	ENSG00000102886	0.243654	0.060248	5.27E-07	0.000246514	0	RNA	GDPD3
220	SCZ	ENSG00000162972	1.21437	0.232477	5.29E-07	0.08255583	1	RNA	MAIP1
221	SCZ	ENSG00000128285	0.139535	0.0364895	5.32E-07	0.000676862	0	RNA	MCHR1
222	SCZ	ENSG00000259387	-0.0178195	0.0120163	5.36E-07	0.000181696	0	RNA	NA
223	SCZ	ENSG00000114904	0.985418	0.196236	5.56E-07	0.9166573	1	RNA	NEK4
224	SCZ	ENSG00000107957	-0.011635	0.042199	6.18E-07	0.09335794	1	RNA	SH3PXD2A
225	SCZ	ENSG00000213593	0.186609	0.0336577	6.28E-07	0.9024908	1	RNA	TMX2
226	SCZ	ENSG00000126460	-0.461782	0.140968	6.34E-07	0.006692506	0	RNA	PRRG2
227	SCZ	ENSG00000184209	0.229253	0.126256	6.48E-07	0.1975625	1	RNA	SNRNP35
228	SCZ	ENSG00000148795	-0.654481	0.142072	6.68E-07	0.00043275	0	RNA	CYP17A1
229	SCZ	ENSG00000115234	-0.151186	0.0502676	7.31E-07	0.02480702	0	RNA	SNX17
230	SCZ	ENSG00000258534	-0.298508	0.0649787	7.58E-07	0.008546747	0	RNA	NA
231	SCZ	ENSG00000120705	0.459752	0.100584	7.75E-07	0.0209343	0	RNA	ETF1
232	SCZ	ENSG00000154822	0.0995291	0.031979	7.78E-07	4.17E-05	0	RNA	PLCL2
233	SCZ	ENSG00000110047	0.185527	0.0585803	7.92E-07	0.01647667	0	RNA	EHD1
234	SCZ	ENSG00000083097	-0.0421116	0.0172795	7.94E-07	0.02903349	0	RNA	DOP1A
235	SCZ	ENSG00000174579	0.665394	0.12788	8.20E-07	0.159459	1	RNA	MSL2
236	SCZ	ENSG00000188522	0.0402253	0.0324805	8.56E-07	0.04634353	0	RNA	FAM83G
237	SCZ	ENSG00000102879	0.231365	0.0755576	8.74E-07	9.83E-05	0	RNA	CORO1A
238	SCZ	ENSG00000172409	0.559274	0.103526	9.09E-07	0.6468797	1	RNA	CLP1
239	SCZ	ENSG00000259242	0.222704	0.0463874	9.12E-07	0.005892932	0	RNA	NA
240	SCZ	ENSG00000111325	1.13751	0.235746	9.13E-07	0.3344649	1	RNA	OGFOD2
241	SCZ	ENSG00000164091	0.457458	0.110814	1.00E-06	0.005075648	0	RNA	WDR82
242	SCZ	ENSG00000141564	0.0534628	0.0363538	1.14E-06	2.40E-05	0	RNA	RPTOR
243	SCZ	ENSG00000148842	1.67597	0.34442	1.14E-06	0.01077532	0	RNA	CNNM2
244	SCZ	ENSG00000066336	-0.211099	0.0631708	1.23E-06	0.01900305	0	RNA	SPI1
245	SCZ	ENSG00000213790	0.415858	0.0819414	1.26E-06	0.09835979	1	RNA	NA
246	SCZ	ENSG00000180423	0.744337	0.177368	1.27E-06	0.1209833	1	RNA	HARBI1
247	SCZ	ENSG00000166793	0.43234	0.115626	1.28E-06	0.007580476	0	RNA	YPEL4
248	SCZ	ENSG00000109956	0.131373	0.0371415	1.30E-06	0.00107544	0	RNA	B3GAT1
249	SCZ	ENSG00000196547	0.0636383	0.0600729	1.32E-06	0.01596141	0	RNA	MAN2A2
250	SCZ	ENSG00000240291	0.0311903	0.0106411	1.33E-06	2.03E-06	0	RNA	NA
251	SCZ	ENSG00000107077	-0.26835	0.0951469	1.41E-06	0.06829795	1	RNA	KDM4C
252	SCZ	ENSG00000110906	-0.0549894	0.015925	1.41E-06	0.09604151	1	RNA	KCTD10
253	SCZ	ENSG00000163932	0.0638536	0.0581216	1.44E-06	0.00326039	0	RNA	PRKCD
254	SCZ	ENSG00000243696	-0.459064	0.0899037	1.45E-06	3.14E-06	0	RNA	NA
255	SCZ	ENSG00000153317	-0.00155725	0.0264513	1.48E-06	7.51E-08	0	RNA	ASAP1
256	SCZ	ENSG00000075413	-0.0376124	0.0268653	1.54E-06	0.000431932	0	RNA	MARK3
257	SCZ	ENSG00000170209	-0.149978	0.0399622	1.56E-06	0.516465	1	RNA	ANKK1
258	SCZ	ENSG00000104388	0.0943342	0.0294906	1.62E-06	0.3247847	1	RNA	RAB2A
259	SCZ	ENSG00000143382	0.0213506	0.034704	1.64E-06	3.87E-07	0	RNA	ADAMTSL4
260	SCZ	ENSG00000196331	-1.45834	0.260903	1.67E-06	6.05E-07	0	RNA	NA
261	SCZ	ENSG00000260910	-0.0421378	0.0136882	1.79E-06	0.06596091	1	RNA	LINC00565
262	SCZ	ENSG00000170802	-0.115833	0.0228047	1.81E-06	0.007850032	0	RNA	FOXN2
263	SCZ	ENSG00000235423	0.144214	0.033587	1.84E-06	4.28E-05	0	RNA	NA
264	SCZ	ENSG00000159479	0.128469	0.0489616	1.93E-06	6.25E-05	0	RNA	MED8
265	SCZ	ENSG00000181896	-0.232694	0.0714635	1.97E-06	0.000300021	0	RNA	ZNF101
266	SCZ	ENSG00000178342	0.599318	0.112581	2.01E-06	0.01520682	0	RNA	KCNG2
267	SCZ	ENSG00000117593	0.25662	0.0649546	2.01E-06	0.03808258	0	RNA	DARS2
268	SCZ	ENSG00000196850	0.310824	0.0738112	2.01E-06	0.001352334	0	RNA	PPTC7
269	SCZ	ENSG00000139437	0.122292	0.0999794	2.04E-06	2.69E-05	0	RNA	TCHP
270	SCZ	ENSG00000175224	-0.407833	0.112512	2.07E-06	0.000420923	0	RNA	ATG13
271	SCZ	ENSG00000255545	0.0753067	0.0213856	2.08E-06	0.004771311	0	RNA	LOC283177
272	SCZ	ENSG00000196781	0.16029	0.12262	2.19E-06	0.006892009	0	RNA	TLE1
273	SCZ	ENSG00000139746	-0.202306	0.0494684	2.20E-06	0.000674911	0	RNA	RBM26
274	SCZ	ENSG00000270108	0.116355	0.0517013	2.20E-06	7.18E-05	0	RNA	NA
275	SCZ	ENSG00000120903	-0.0295646	0.104786	2.22E-06	6.99E-05	0	RNA	CHRNA2
276	SCZ	ENSG00000143387	0.0255005	0.0158688	2.23E-06	0.009660158	0	RNA	CTSK
277	SCZ	ENSG00000100418	0.174162	0.0583245	2.27E-06	0.000305686	0	RNA	DESI1
278	SCZ	ENSG00000154025	0.741545	0.180055	2.32E-06	0.1250957	1	RNA	SLC5A10
279	SCZ	ENSG00000120899	0.0460662	0.0227345	2.40E-06	2.31E-06	0	RNA	PTK2B
280	SCZ	ENSG00000173208	-0.233249	0.0624807	2.43E-06	0.02334528	0	RNA	ABCD2
281	SCZ	ENSG00000090975	1.11723	0.253268	2.58E-06	0.1699779	1	RNA	PITPNM2
282	SCZ	ENSG00000105928	0.0930003	0.0205359	2.60E-06	0.0395249	0	RNA	GSDME
283	SCZ	ENSG00000158691	-0.00113643	0.0758616	2.69E-06	6.56E-11	0	RNA	ZSCAN12
284	SCZ	ENSG00000142233	0.191946	0.0441613	2.75E-06	0.007170413	0	RNA	NTN5
285	SCZ	ENSG00000247735	-0.370833	0.0747287	2.76E-06	0.1165092	1	RNA	NA
286	SCZ	ENSG00000100372	0.309247	0.0768179	2.85E-06	0.03792427	0	RNA	SLC25A17
287	SCZ	ENSG00000104228	-0.109987	0.0296792	2.85E-06	0.001756174	0	RNA	TRIM35
288	SCZ	ENSG00000064490	0.0300892	0.0343717	2.89E-06	0.003016151	0	RNA	RFXANK
289	SCZ	ENSG00000153406	0.0847716	0.0180055	2.91E-06	0.01433813	0	RNA	NMRAL1
290	SCZ	ENSG00000114841	0.0853635	0.0604583	2.93E-06	0.000267299	0	RNA	DNAH1
291	SCZ	ENSG00000196756	0.00752997	0.0120431	2.95E-06	0.1115288	1	RNA	SNHG17
292	SCZ	ENSG00000072736	0.17505	0.0534612	2.95E-06	2.08E-05	0	RNA	NFATC3
293	SCZ	ENSG00000143409	-0.0622293	0.0947522	3.15E-06	3.03E-05	0	RNA	MINDY1
294	SCZ	ENSG00000100207	0.21376	0.125277	3.17E-06	5.45E-06	0	RNA	TCF20
295	SCZ	ENSG00000197696	0.201733	0.034154	3.18E-06	0.2332147	1	RNA	NMB
296	SCZ	ENSG00000146166	0.106751	0.0243485	3.34E-06	0.04081942	0	RNA	LGSN
297	PD	ENSG00000238083	-0.252971	0.0277533	3.49E-17	0.000367925	0	RNA	LRRC37A2
298	PD	ENSG00000262539	-0.393983	0.0449646	8.96E-17	0.000127858	0	RNA	NA
299	PD	ENSG00000214401	-0.181846	0.0204515	1.77E-16	0.000527768	0	RNA	KANSL1-AS1
300	PD	ENSG00000261575	-0.252022	0.0290596	4.94E-16	0.000902462	0	RNA	NA
301	PD	ENSG00000262500	-0.636924	0.0753481	2.49E-15	0.00076951	0	RNA	NA
302	PD	ENSG00000214846	-0.157822	0.0271192	1.19E-13	0.1699769	1	RNA	NA
303	PD	ENSG00000185829	-0.210629	0.0654663	2.65E-11	5.54E-08	0	RNA	ARL17A
304	PD	ENSG00000108379	-1.24914	0.177138	3.30E-11	4.41E-06	0	RNA	WNT3
305	PD	ENSG00000131484	0.426997	0.0510473	5.87E-11	2.03E-05	0	RNA	NA
306	PD	ENSG00000138722	-0.281725	0.124414	7.47E-11	7.07E-18	0	RNA	MMRN1
307	PD	ENSG00000109743	-0.248132	0.0354807	9.52E-11	0.2898326	1	RNA	BST1
308	PD	ENSG00000127415	-0.340514	0.0632322	1.47E-10	0.01678037	0	RNA	IDUA
309	PD	ENSG00000145335	-0.802062	0.0831909	2.29E-10	1.48E-13	0	RNA	SNCA
310	PD	ENSG00000120071	-0.59405	0.176152	2.38E-10	8.56E-07	0	RNA	KANSL1
311	PD	ENSG00000260075	0.0759023	0.025717	2.20E-09	4.34E-11	0	RNA	NA
312	PD	ENSG00000237765	0.143325	0.0327542	2.32E-09	1.67E-06	0	RNA	FAM200B
313	PD	ENSG00000103510	-0.352365	0.0801556	3.82E-09	0.000143713	0	RNA	KAT8
314	PD	ENSG00000145214	-0.124279	0.0225374	3.95E-09	3.38E-06	0	RNA	DGKQ
315	PD	ENSG00000226816	-0.14498	0.025696	4.72E-09	0.006529136	0	RNA	NA
316	PD	ENSG00000136243	0.237913	0.0419803	5.67E-09	0.5656513	1	RNA	NUP42
317	PD	ENSG00000136235	0.24504	0.0432117	6.11E-09	0.322162	1	RNA	GPNMB
318	PD	ENSG00000230658	-0.0981858	0.0195158	6.54E-09	0.02368303	0	RNA	NA
319	PD	ENSG00000073969	-0.832092	0.109792	9.09E-09	4.77E-08	0	RNA	NSF
320	PD	ENSG00000264070	-0.236331	0.0259161	9.72E-09	0.01426126	0	RNA	NA
321	PD	ENSG00000103496	-0.258864	0.0505949	1.08E-08	1.37E-05	0	RNA	STX4
322	PD	ENSG00000260911	-0.128174	0.0250955	1.17E-08	3.28E-05	0	RNA	NA
323	PD	ENSG00000099381	-0.941306	0.162736	1.21E-08	0.339816	1	RNA	SETD1A
324	PD	ENSG00000167394	0.249193	0.0513702	1.21E-08	0.000131658	0	RNA	ZNF668
325	PD	ENSG00000214425	0.202097	0.0220158	1.24E-08	0.005483262	0	RNA	NA
326	PD	ENSG00000103507	0.366985	0.0718386	2.56E-08	0.0022465	0	RNA	BCKDK
327	PD	ENSG00000267198	0.861103	0.126766	2.57E-08	4.58E-08	0	RNA	NA
328	PD	ENSG00000080854	-0.244766	0.117119	3.63E-08	6.87E-05	0	RNA	IGSF9B
329	PD	ENSG00000140678	0.0533835	0.0264905	3.87E-08	4.03E-05	0	RNA	ITGAX
330	PD	ENSG00000225190	-1.04883	0.139409	4.00E-08	6.13E-08	0	RNA	PLEKHM1
331	PD	ENSG00000122550	-0.359948	0.0817596	5.33E-08	0.000290867	0	RNA	KLHL7
332	PD	ENSG00000263503	-0.210918	0.0229858	5.42E-08	0.01182895	0	RNA	NA
333	PD	ENSG00000118564	-0.202104	0.0971719	5.63E-08	3.00E-05	0	RNA	FBXL5
334	PD	ENSG00000230042	0.229329	0.0477457	6.29E-08	0.01019513	0	RNA	NA
335	PD	ENSG00000103549	0.107597	0.104809	6.63E-08	9.00E-09	0	RNA	RNF40
336	PD	ENSG00000254918	-0.733318	0.155423	1.01E-07	0.00047408	0	RNA	NA
337	PD	ENSG00000156858	0.831787	0.186994	1.12E-07	0.001582623	0	RNA	PRR14
338	PD	ENSG00000138744	-0.0180717	0.02243	1.14E-07	0.0121949	0	RNA	NAAA
339	PD	ENSG00000178226	-0.68013	0.156575	1.41E-07	0.000418012	0	RNA	PRSS36
340	PD	ENSG00000159314	0.0733397	0.0626987	1.73E-07	4.61E-07	0	RNA	ARHGAP27
341	PD	ENSG00000232300	-0.137824	0.0398054	1.76E-07	4.73E-07	0	RNA	NA
342	PD	ENSG00000127419	-0.843504	0.182574	2.00E-07	0.01385043	0	RNA	TMEM175
343	PD	ENSG00000266918	-0.51325	0.10539	2.02E-07	9.45E-06	0	RNA	NA
344	PD	ENSG00000138760	0.567835	0.119383	3.08E-07	0.003258156	0	RNA	SCARB2
345	PD	ENSG00000145217	0.264599	0.101974	3.30E-07	1.42E-08	0	RNA	SLC26A1
346	PD	ENSG00000261245	0.0601668	0.032694	3.52E-07	0.000172266	0	RNA	NA
347	PD	ENSG00000099377	0.434909	0.0919051	3.56E-07	0.001058424	0	RNA	HSD3B7
348	PD	ENSG00000204650	-0.261078	0.0282057	4.87E-07	0.00366604	0	RNA	LINC02210
349	PD	ENSG00000102882	0.00419203	0.0513524	5.11E-07	0.4664989	1	RNA	MAPK3
350	PD	ENSG00000167397	0.659957	0.155417	6.48E-07	0.01366316	0	RNA	VKORC1
351	PD	ENSG00000164182	0.798491	0.150603	1.06E-06	0.000149527	0	RNA	NDUFAF2
352	PD	ENSG00000118804	-0.0202995	0.0841965	1.15E-06	1.67E-06	0	RNA	STBD1
353	PD	ENSG00000156886	0.0109819	0.0668472	1.18E-06	0.76674	1	RNA	ITGAD
354	PD	ENSG00000169231	-0.0536678	0.0347602	1.38E-06	0.001004004	0	RNA	THBS3
355	PD	ENSG00000185499	0.106918	0.120937	1.56E-06	2.08E-05	0	RNA	MUC1
356	PD	ENSG00000185619	-0.0610716	0.0484151	1.72E-06	0.000198101	0	RNA	PCGF3
357	PD	ENSG00000198648	-0.0834729	0.0441823	1.81E-06	7.04E-05	0	RNA	STK39
358	PD	ENSG00000262766	-0.597462	0.138278	2.23E-06	0.0667655	1	RNA	NA
359	PD	ENSG00000099385	0.233521	0.18086	2.68E-06	3.04E-06	0	RNA	BCL7C
360	PD	ENSG00000069275	-0.10021	0.0537751	2.72E-06	7.75E-06	0	RNA	NUCKS1
361	PD	ENSG00000176681	0.0865829	0.029349	2.99E-06	5.20E-10	0	RNA	LRRC37A
362	AN	ENSG00000178252	-0.101654	0.0216366	1.64E-11	9.25E-07	0	RNA	WDR6
363	AN	ENSG00000225697	-0.369095	0.0606354	1.81E-11	0.001096938	0	RNA	SLC26A6
364	AN	ENSG00000008300	0.586907	0.0841924	3.84E-11	0.03983952	0	RNA	CELSR3
365	AN	ENSG00000185909	-0.425006	0.0621539	3.97E-11	0.230662	1	RNA	KLHDC8B
366	AN	ENSG00000164062	-0.233592	0.0480453	1.57E-10	3.32E-08	0	RNA	APEH
367	AN	ENSG00000068745	0.0656373	0.103333	2.22E-10	1.10E-05	0	RNA	IP6K2
368	AN	ENSG00000145020	0.0257963	0.0302072	1.56E-09	6.50E-11	0	RNA	AMT
369	AN	ENSG00000164053	-0.115766	0.0550558	1.08E-08	0.000643764	0	RNA	ATRIP
370	AN	ENSG00000004534	-0.0740779	0.0178048	1.21E-08	0.03158865	0	RNA	RBM6
371	AN	ENSG00000182179	-0.0906161	0.023067	1.29E-08	0.004037342	0	RNA	UBA7
372	AN	ENSG00000213672	0.337291	0.0641826	1.59E-08	3.78E-06	0	RNA	NCKIPSD
373	AN	ENSG00000182985	0.491256	0.095233	1.62E-08	0.09800196	1	RNA	CADM1
374	AN	ENSG00000178467	0.206938	0.0434196	2.01E-08	2.59E-07	0	RNA	P4HTM
375	AN	ENSG00000186792	0.0480779	0.0212281	2.62E-08	0.000868295	0	RNA	HYAL3
376	AN	ENSG00000177479	0.406464	0.088882	3.99E-08	3.90E-06	0	RNA	ARIH2
377	AN	ENSG00000170430	0.0805807	0.019464	9.17E-08	0.03262822	0	RNA	MGMT
378	AN	ENSG00000178035	1.48312	0.289983	1.50E-07	0.4559681	1	RNA	IMPDH2
379	AN	ENSG00000177352	-0.588001	0.115929	4.15E-07	1.01E-05	0	RNA	CCDC71
380	AN	ENSG00000164077	-0.138183	0.0815351	5.30E-07	3.80E-05	0	RNA	MON1A
381	AN	ENSG00000173402	-0.764175	0.17509	5.62E-07	0.003529747	0	RNA	DAG1
382	AN	ENSG00000114302	0.782622	0.142224	7.03E-07	5.30E-05	0	RNA	PRKAR2A
383	AN	ENSG00000172037	-0.664728	0.142887	8.08E-07	2.16E-05	0	RNA	LAMB2
384	AN	ENSG00000114270	-1.02705	0.275432	1.20E-06	0.01712913	0	RNA	COL7A1
385	AN	ENSG00000178977	-0.0884592	0.025679	1.37E-06	0.08964492	1	RNA	LINC00324
386	AN	ENSG00000224424	0.542112	0.140351	1.55E-06	0.06490277	1	RNA	PRKAR2A-AS1
387	AN	ENSG00000173531	0.0126618	0.0626104	1.66E-06	4.05E-07	0	RNA	MST1
388	AN	ENSG00000178971	-0.0722107	0.0202034	2.23E-06	0.03157968	0	RNA	CTC1
389	AN	ENSG00000068878	0.232123	0.0783959	2.56E-06	0.000930017	0	RNA	PSME4
390	AN	ENSG00000198218	-0.0105606	0.0585431	2.80E-06	1.97E-10	0	RNA	QRICH1
391	AN	ENSG00000213689	0.0157439	0.0426182	3.04E-06	0.03262379	0	RNA	TREX1
392	AN	ENSG00000269928	-0.0704444	0.0197425	3.17E-06	0.02367448	0	RNA	NA
393	BP	ENSG00000168016	0.0117853	0.0459752	2.31E-08	1.26E-08	0	RNA	TRANK1
394	BP	ENSG00000055955	-0.103776	0.0257086	9.51E-08	0.000368092	0	RNA	ITIH4
395	BP	ENSG00000124102	0.155948	0.0398884	1.32E-07	0.001281758	0	RNA	PI3
396	BP	ENSG00000168268	0.130631	0.0361177	1.34E-07	2.12E-07	0	RNA	NT5DC2
397	BP	ENSG00000234073	0.0117035	0.0226728	1.48E-07	4.28E-08	0	RNA	NA
398	BP	ENSG00000093167	-0.106432	0.0329999	1.65E-07	1.35E-06	0	RNA	LRRFIP2
399	BP	ENSG00000164088	0.174848	0.0362164	1.73E-07	0.01162518	0	RNA	PPM1M
400	BP	ENSG00000168237	0.170759	0.035144	1.74E-07	0.006593868	0	RNA	GLYCTK
401	BP	ENSG00000114902	-0.352234	0.0710013	1.89E-07	0.001535193	0	RNA	SPCS1
402	BP	ENSG00000163938	0.526735	0.101806	1.97E-07	0.1116644	1	RNA	GNL3
403	BP	ENSG00000243224	0.24079	0.0476163	2.20E-07	0.00926333	0	RNA	LOC101929054
404	BP	ENSG00000124233	0.22163	0.0570573	3.11E-07	0.000375917	0	RNA	SEMG1
405	BP	ENSG00000016864	0.581222	0.121328	4.60E-07	0.05165517	1	RNA	GLT8D1
406	BP	ENSG00000250067	-0.378971	0.0724226	4.69E-07	0.01547547	0	RNA	YJEFN3
407	BP	ENSG00000162267	-0.61415	0.131644	5.88E-07	0.04644717	0	RNA	ITIH3
408	BP	ENSG00000173621	0.226296	0.0440854	6.76E-07	0.735438	1	RNA	LRFN4
409	BP	ENSG00000167914	0.0884196	0.0395686	1.02E-06	5.72E-05	0	RNA	GSDMA
410	BP	ENSG00000174080	-0.0793179	0.0245021	1.04E-06	0.006363621	0	RNA	CTSF
411	BP	ENSG00000090263	0.217457	0.068518	1.06E-06	0.004199309	0	RNA	MRPS33
412	BP	ENSG00000213533	-0.0943028	0.0546386	1.48E-06	8.66E-05	0	RNA	STIMATE
413	BP	ENSG00000242142	-0.0399251	0.0175668	1.55E-06	1.68E-05	0	RNA	NA
414	BP	ENSG00000064490	-0.025	0.0497581	1.63E-06	0.005167431	0	RNA	RFXANK
415	BP	ENSG00000242797	0.258154	0.0548393	1.91E-06	0.1332466	1	RNA	NA
416	BP	ENSG00000148700	0.23127	0.0510145	1.97E-06	0.0657556	1	RNA	ADD3
417	BP	ENSG00000167535	0.10719	0.0375797	2.03E-06	0.00051334	0	RNA	CACNB3
418	BP	ENSG00000176485	-0.0172461	0.0197989	2.05E-06	0.03106372	0	RNA	PLAAT3
419	BP	ENSG00000180979	0.257877	0.0528513	2.15E-06	0.1147584	1	RNA	LRRC57
420	BP	ENSG00000175115	0.322937	0.066866	2.38E-06	0.6719965	1	RNA	PACS1
421	BP	ENSG00000128285	0.249702	0.0508793	2.41E-06	0.01049269	0	RNA	MCHR1
422	BP	ENSG00000178093	0.49763	0.0949424	2.68E-06	0.05991668	1	RNA	TSSK6
423	BP	ENSG00000167491	0.0709641	0.0286968	2.96E-06	4.96E-07	0	RNA	GATAD2A
424	BP	ENSG00000144668	-0.128163	0.0732154	3.00E-06	0.07638075	1	RNA	ITGA9
425	BP	ENSG00000100038	0.0640654	0.0336292	3.16E-06	0.000160746	0	RNA	TOP3B
426	BP	ENSG00000073584	0.0207302	0.0204234	3.25E-06	0.233832	1	RNA	SMARCE1
427	MD	ENSG00000187626	-0.228602	0.0396372	5.79E-09	0.1114204	1	RNA	ZKSCAN4
428	MD	ENSG00000196812	-0.243586	0.0502249	1.62E-08	0.00210885	0	RNA	ZSCAN16
429	MD	ENSG00000112812	-0.137651	0.0311543	3.90E-08	0.006371849	0	RNA	PRSS16
430	MD	ENSG00000197279	-0.514051	0.107445	6.48E-08	0.3990728	1	RNA	ZNF165
431	MD	ENSG00000204789	-0.0717266	0.0372569	7.13E-08	0.4363647	1	RNA	NA
432	MD	ENSG00000172260	0.107401	0.0207793	7.82E-08	0.004749455	0	RNA	NEGR1
433	MD	ENSG00000137338	-0.240404	0.0600466	7.90E-08	0.0579515	1	RNA	PGBD1
434	MD	ENSG00000219891	-0.074884	0.0177902	7.94E-08	0.000879271	0	RNA	NA
435	MD	ENSG00000197062	0.0785095	0.028569	1.22E-07	0.000801737	0	RNA	ZSCAN26
436	MD	ENSG00000137185	0.00322747	0.0186296	2.38E-07	0.002813242	0	RNA	ZSCAN9
437	MD	ENSG00000197914	0.0142396	0.0268497	2.84E-07	0.05159347	1	RNA	NA
438	MD	ENSG00000219392	0.0862363	0.0215781	4.55E-07	0.001322001	0	RNA	NA
439	MD	ENSG00000124613	0.0342186	0.0294492	5.69E-07	3.08E-05	0	RNA	ZNF391
440	MD	ENSG00000197903	0.0454399	0.0241505	6.85E-07	4.29E-06	0	RNA	H2BC12
441	MD	ENSG00000189298	-0.108901	0.0344025	8.75E-07	6.26E-08	0	RNA	ZKSCAN3
442	MD	ENSG00000124508	-0.127752	0.0303605	9.71E-07	0.00205746	0	RNA	BTN2A2
443	MD	ENSG00000186470	0.0501312	0.00908258	1.12E-06	0.1950619	1	RNA	BTN3A2
444	MD	ENSG00000101751	-0.0542213	0.0159104	1.35E-06	0.4295444	1	RNA	POLI
445	MD	ENSG00000228223	0.00180375	0.0237567	2.33E-06	1.56E-07	0	RNA	HCG11
446	MD	ENSG00000112763	-0.0276553	0.018384	2.64E-06	0.000862015	0	RNA	BTN2A1
447	MD	ENSG00000224997	0.0247582	0.0160633	3.29E-06	5.77E-05	0	RNA	NA
448	ADHD	ENSG00000159479	0.30747	0.0684404	3.36E-11	1.25E-06	0	RNA	MED8
449	ADHD	ENSG00000159214	0.105121	0.0250738	4.88E-11	0.006057332	0	RNA	CCDC24
450	ADHD	ENSG00000117410	0.124025	0.0667599	1.22E-09	2.56E-07	0	RNA	ATP6V0B
451	ADHD	ENSG00000247828	-0.0629129	0.0194256	4.42E-08	0.000155929	0	RNA	TMEM161B-AS1
452	ADHD	ENSG00000117400	0.440968	0.0899717	8.93E-08	0.002537036	0	RNA	MPL
453	ADHD	ENSG00000066322	0.764405	0.184018	2.19E-07	0.000287056	0	RNA	ELOVL1
454	ADHD	ENSG00000234694	0.255709	0.0526452	6.91E-07	0.01051089	0	RNA	NA
455	ADHD	ENSG00000178966	-0.289483	0.0719955	2.03E-06	0.2817993	1	RNA	RMI1
456	ADHD	ENSG00000186792	-0.0788031	0.0205005	2.56E-06	0.4361433	1	RNA	HYAL3
457	ADHD	ENSG00000229431	0.37108	0.0795558	2.82E-06	0.07103764	1	RNA	NA
458	AD	ENSG00000130202	-0.00348374	0.00282116	3.35E-94	1.97E-30	0	RNA	NECTIN2
459	AD	ENSG00000186567	0.113428	0.0233396	9.14E-16	6.36E-06	0	RNA	CEACAM19
460	AD	ENSG00000007255	-0.0809746	0.0111728	2.64E-15	3.43E-23	0	RNA	TRAPPC6A
461	AD	ENSG00000136717	0.0300754	0.00351336	1.14E-14	5.48E-09	0	RNA	BIN1
462	AD	ENSG00000110077	0.0431134	0.00551797	2.38E-13	0.005430825	0	RNA	MS4A6A
463	AD	ENSG00000110079	0.0618268	0.0090065	2.68E-13	0.005503535	0	RNA	MS4A4A
464	AD	ENSG00000149534	-0.0654772	0.0111116	5.77E-12	0.000281318	0	RNA	MS4A2
465	AD	ENSG00000121716	0.00224411	0.00272449	3.18E-10	3.88E-11	0	RNA	PILRB
466	AD	ENSG00000134827	0.0371655	0.0116123	3.67E-10	9.53E-06	0	RNA	TCN1
467	AD	ENSG00000073008	-0.0112982	0.0568348	4.11E-10	9.50E-06	0	RNA	PVR
468	AD	ENSG00000229153	-0.0182332	0.00373549	8.14E-10	0.03672274	0	RNA	EPHA1-AS1
469	AD	ENSG00000140090	-0.0231554	0.00466532	9.61E-10	0.00204168	0	RNA	SLC24A4
470	AD	ENSG00000213413	-0.0322775	0.00541934	2.84E-09	0.004595692	0	RNA	PVRIG
471	AD	ENSG00000158869	-0.0134093	0.00300366	8.30E-09	0.000368842	0	RNA	FCER1G
472	AD	ENSG00000146904	-0.0714285	0.0112429	8.56E-09	0.2623334	1	RNA	EPHA1
473	AD	ENSG00000197093	-0.0610393	0.0100677	1.14E-08	0.000635092	0	RNA	GAL3ST4
474	AD	ENSG00000185899	-0.065883	0.0138959	3.09E-08	0.009481932	0	RNA	TAS2R60
475	AD	ENSG00000221838	0.0161296	0.00626831	3.17E-08	4.75E-06	0	RNA	AP4M1
476	AD	ENSG00000125753	0.0104057	0.00427026	3.77E-08	0.000809209	0	RNA	VASP
477	AD	ENSG00000239521	-0.0578078	0.0100636	4.26E-08	0.02566958	0	RNA	CASTOR3
478	AD	ENSG00000159840	0.0109941	0.00494726	4.36E-08	5.90E-06	0	RNA	ZYX
479	AD	ENSG00000102882	0.0259667	0.0234019	5.01E-08	0.2396847	1	RNA	MAPK3
480	AD	ENSG00000158864	-0.079463	0.013315	5.38E-08	0.2840598	1	RNA	NDUFS2
481	AD	ENSG00000146833	-0.00917168	0.00317146	5.69E-08	0.0003024	0	RNA	TRIM4
482	AD	ENSG00000120915	-0.010784	0.00457453	6.05E-08	2.11E-08	0	RNA	EPHX2
483	AD	ENSG00000168090	-0.00799177	0.00634036	6.15E-08	3.02E-05	0	RNA	COPS6
484	AD	ENSG00000196411	0.0117011	0.0037411	6.31E-08	0.2948368	1	RNA	EPHB4
485	AD	ENSG00000254952	0.0118785	0.00843638	8.42E-08	0.01401019	0	RNA	NA
486	AD	ENSG00000188186	0.027606	0.00899337	1.11E-07	2.61E-06	0	RNA	LAMTOR4
487	AD	ENSG00000085514	0.222035	0.0385147	1.14E-07	0.2097056	1	RNA	PILRA
488	AD	ENSG00000066923	0.00105199	0.00537999	1.20E-07	3.02E-09	0	RNA	STAG3
489	AD	ENSG00000140678	0.00910832	0.00323486	1.75E-07	0.000761233	0	RNA	ITGAX
490	AD	ENSG00000166997	-0.00769198	0.00802661	1.90E-07	3.84E-06	0	RNA	CNPY4
491	AD	ENSG00000103507	0.0404777	0.00885962	1.93E-07	0.3051115	1	RNA	BCKDK
492	AD	ENSG00000260911	-0.0125342	0.00306574	1.98E-07	6.58E-05	0	RNA	NA
493	AD	ENSG00000103496	-0.0252151	0.0061807	2.15E-07	7.78E-05	0	RNA	STX4
494	AD	ENSG00000167394	0.0286403	0.00636284	2.23E-07	0.008180245	0	RNA	ZNF668
495	AD	ENSG00000103510	-0.0528267	0.00982823	3.58E-07	0.22386	1	RNA	KAT8
496	AD	ENSG00000078487	-0.00695105	0.0105286	3.58E-07	6.16E-09	0	RNA	ZCWPW1
497	AD	ENSG00000167083	0.0152251	0.00595362	4.25E-07	7.55E-06	0	RNA	GNGT2
498	AD	ENSG00000069399	-0.466901	0.0926873	4.72E-07	3.23E-06	0	RNA	BCL3
499	AD	ENSG00000185955	0.00852672	0.0260048	4.77E-07	9.89E-06	0	RNA	C7orf61
500	AD	ENSG00000101138	0.0707931	0.0172658	5.91E-07	0.000405552	0	RNA	CSTF1
501	AD	ENSG00000106261	0.0292415	0.0109074	6.41E-07	8.36E-05	0	RNA	ZKSCAN1
502	AD	ENSG00000230666	-0.00387566	0.0194935	6.56E-07	8.69E-09	0	RNA	CEACAM22P
503	AD	ENSG00000146834	-0.00407193	0.00916539	8.02E-07	7.65E-08	0	RNA	MEPCE
504	AD	ENSG00000232533	-0.0338186	0.00800185	8.05E-07	0.002936296	0	RNA	NA
505	AD	ENSG00000103549	-0.00721251	0.0137466	8.25E-07	1.32E-05	0	RNA	RNF40
506	AD	ENSG00000159784	-0.0185671	0.0152957	8.34E-07	0.001746889	0	RNA	FAM131B
507	AD	ENSG00000100599	-0.0582912	0.0119679	8.48E-07	0.006739862	0	RNA	RIN3
508	AD	ENSG00000158882	0.0022598	0.00776355	8.58E-07	1.51E-06	0	RNA	TOMM40L
509	AD	ENSG00000236911	0.00705272	0.00517159	9.79E-07	1.33E-11	0	RNA	NA
510	AD	ENSG00000261245	0.0125182	0.00397739	1.17E-06	0.007139014	0	RNA	NA
511	AD	ENSG00000228601	0.0530008	0.0101323	1.24E-06	0.6639008	1	RNA	NA
512	AD	ENSG00000128923	-0.0435465	0.00991288	1.27E-06	1.16E-05	0	RNA	MINDY2
513	AD	ENSG00000158850	-0.0964786	0.0166574	1.29E-06	0.03644523	0	RNA	B4GALT3
514	AD	ENSG00000099381	-0.0703424	0.0187636	1.48E-06	0.003169748	0	RNA	SETD1A
515	AD	ENSG00000173868	-0.0488507	0.0140235	1.60E-06	0.002177242	0	RNA	PHOSPHO1
516	AD	ENSG00000099377	0.0510719	0.0113968	1.62E-06	0.01574017	0	RNA	HSD3B7
517	AD	ENSG00000146826	-0.00103133	0.00855582	1.67E-06	1.26E-05	0	RNA	MAP11
518	AD	ENSG00000197721	0.00409414	0.00842702	1.95E-06	1.07E-06	0	RNA	CR1L
519	AD	ENSG00000166925	-0.0959639	0.0203134	2.17E-06	0.000299604	0	RNA	TSC22D4
520	AD	ENSG00000158773	0.00352848	0.00556395	2.22E-06	0.000274363	0	RNA	USF1
521	AD	ENSG00000176125	0.0136796	0.00602645	2.86E-06	0.1866972	1	RNA	UFSP1
522	AD	ENSG00000169592	0.029274	0.00720208	2.87E-06	0.4004409	1	RNA	INO80E
523	ASD	ENSG00000088930	0.164615	0.0295675	1.81E-08	0.00815986	0	RNA	XRN2
524	ASD	ENSG00000088970	0.195041	0.0404201	5.03E-08	0.006113089	0	RNA	KIZ
