# Supplementary material for: A Comprehensive Evaluation of Cross-Omics Blood-Based Biomarkers for Neuropsychiatric Disorders
Source: J Pers Med. 2021 Nov 24;11(12):1247. doi: 10.3390/jpm11121247 (PMC8703948; doi:10.3390/jpm11121247)
Supplement: Supplementary file 1 [file jpm-11-01247-s001.zip › Table S2.csv]

disease	site	b	se	p	pHEIDI	filter	omic
SCZ	cg21438527	-0.106716	0.00896319	1.62E-37	2.66E-09	0	methyl
SCZ	cg23892028	-0.0880415	0.00806761	2.38E-37	1.48E-05	0	methyl
SCZ	cg14345882	-0.0970525	0.00930823	9.33E-37	9.26E-12	0	methyl
SCZ	cg18278486	0.0783661	0.0115204	8.27E-30	2.56E-12	0	methyl
SCZ	cg26587870	0.0128475	0.0135	1.39E-29	3.96E-13	0	methyl
SCZ	cg23161317	-0.0885869	0.0123514	1.18E-27	1.86E-08	0	methyl
SCZ	cg12963246	-0.0804655	0.0111272	1.36E-27	2.84E-09	0	methyl
SCZ	cg21204522	0.0143246	0.0150553	1.30E-26	2.08E-12	0	methyl
SCZ	cg19041857	0.0133165	0.0139938	7.11E-26	5.65E-12	0	methyl
SCZ	cg06084579	0.0504553	0.010287	1.16E-25	2.00E-11	0	methyl
SCZ	cg19592336	-0.0816386	0.011303	1.65E-25	1.48E-08	0	methyl
SCZ	cg10547057	0.102162	0.0149405	2.05E-25	8.38E-11	0	methyl
SCZ	cg08798685	0.0259249	0.0158395	4.40E-25	5.48E-13	0	methyl
SCZ	cg27179866	-0.127164	0.0155369	5.85E-25	2.08E-05	0	methyl
SCZ	cg23281280	-0.082339	0.0114106	1.10E-24	3.64E-10	0	methyl
SCZ	cg07220782	0.112267	0.017056	2.40E-24	5.63E-08	0	methyl
SCZ	cg22143856	-0.0971973	0.0136839	1.66E-23	1.08E-06	0	methyl
SCZ	cg06035815	-0.109392	0.0164598	2.17E-22	4.24E-12	0	methyl
SCZ	cg10876282	-0.0989844	0.0149228	4.45E-22	1.65E-05	0	methyl
SCZ	cg06781135	0.135127	0.0211028	1.15E-21	1.65E-07	0	methyl
SCZ	cg11823142	-0.0907638	0.0145992	1.57E-21	3.41E-07	0	methyl
SCZ	cg22548220	-0.278636	0.0304818	2.34E-21	0.002958692	0	methyl
SCZ	cg21488066	0.142366	0.0180109	2.64E-21	0.000148861	0	methyl
SCZ	cg07660236	0.142735	0.0182793	6.34E-21	3.39E-05	0	methyl
SCZ	cg11369071	0.138845	0.0218041	9.66E-21	1.82E-07	0	methyl
SCZ	cg11502198	-0.036745	0.00846473	1.12E-20	5.22E-15	0	methyl
SCZ	cg26336265	-0.0853243	0.0153898	1.18E-20	4.07E-08	0	methyl
SCZ	cg08968635	-0.134906	0.0198657	1.75E-20	1.78E-07	0	methyl
SCZ	cg20151795	-0.113995	0.0163048	1.83E-20	1.08E-07	0	methyl
SCZ	cg26335602	-0.112552	0.0161433	4.23E-20	4.07E-08	0	methyl
SCZ	cg12315302	-0.350307	0.039969	2.84E-19	0.003541427	0	methyl
SCZ	cg12292205	0.11394	0.016821	3.09E-19	8.96E-11	0	methyl
SCZ	cg01192291	0.249866	0.031891	3.17E-19	3.91E-07	0	methyl
SCZ	cg15969227	0.0368735	0.0104465	4.32E-19	1.54E-10	0	methyl
SCZ	cg06675483	0.154763	0.0241843	4.84E-19	1.81E-07	0	methyl
SCZ	cg07011110	-0.00794474	0.00927021	9.57E-19	0.2750253	1	methyl
SCZ	cg03115532	0.015931	0.00731845	2.21E-18	0.4313326	1	methyl
SCZ	cg01566283	0.162878	0.0249327	6.68E-18	9.90E-06	0	methyl
SCZ	cg03885818	-0.0849624	0.0111262	6.71E-18	2.83E-05	0	methyl
SCZ	cg05412957	-0.0231538	0.0076827	2.77E-17	1.09E-05	0	methyl
SCZ	cg18032046	0.145548	0.0234814	4.64E-17	9.81E-05	0	methyl
SCZ	cg11079354	-0.174648	0.0242395	1.46E-16	0.000197017	0	methyl
SCZ	cg03517284	0.0201132	0.00797825	1.66E-16	0.005676548	0	methyl
SCZ	cg03264133	0.0199581	0.00797439	1.78E-16	0.005649694	0	methyl
SCZ	cg12310025	0.0196027	0.00800802	3.57E-16	0.005105881	0	methyl
SCZ	cg26958806	-0.451499	0.0561369	1.58E-15	0.000125055	0	methyl
SCZ	cg18674961	-0.0610535	0.00760318	2.05E-15	0.03293018	0	methyl
SCZ	cg21350413	0.0753179	0.021004	3.21E-15	1.68E-06	0	methyl
SCZ	cg23532300	0.217269	0.0356375	3.24E-15	0.000985966	0	methyl
SCZ	cg26478107	-0.0896049	0.0212179	4.54E-15	0.002820315	0	methyl
SCZ	cg03493300	-0.111871	0.0143259	4.56E-15	0.01320798	0	methyl
SCZ	cg18835472	-0.0649884	0.0175883	7.36E-15	5.38E-09	0	methyl
SCZ	cg06664930	0.213065	0.0348955	1.24E-14	1.75E-05	0	methyl
SCZ	cg06737250	0.0311672	0.00725076	2.21E-14	1.35E-05	0	methyl
SCZ	cg00065396	-0.146352	0.0317338	2.51E-14	0.003672539	0	methyl
SCZ	cg04020984	0.204686	0.0352082	2.99E-14	1.64E-05	0	methyl
SCZ	cg27286614	0.0641047	0.00804789	4.38E-14	0.07683302	1	methyl
SCZ	cg00894378	-0.194247	0.0305026	5.22E-14	0.1392531	1	methyl
SCZ	cg23649088	-0.0277294	0.00750836	5.58E-14	1.38E-10	0	methyl
SCZ	cg12169700	0.0538501	0.00779136	5.77E-14	3.53E-06	0	methyl
SCZ	cg16178271	0.0547925	0.00786315	6.09E-14	1.06E-06	0	methyl
SCZ	cg03075889	0.051283	0.00784054	6.81E-14	2.26E-07	0	methyl
SCZ	cg15574437	0.0639938	0.00783674	8.39E-14	0.135144	1	methyl
SCZ	cg17949981	-0.182427	0.028533	1.08E-13	1.17E-05	0	methyl
SCZ	cg20250722	-0.381805	0.0572328	1.59E-13	0.01431982	0	methyl
SCZ	cg02951883	0.0876043	0.011244	1.76E-13	0.07703207	1	methyl
SCZ	cg11601967	0.0649697	0.0102486	2.49E-13	0.04828304	0	methyl
SCZ	cg09084244	0.0458465	0.00715346	2.50E-13	0.02529872	0	methyl
SCZ	cg26429017	0.040455	0.00787574	3.16E-13	3.60E-10	0	methyl
SCZ	cg20610915	-0.601947	0.0911941	3.26E-13	0.001319503	0	methyl
SCZ	cg00671126	0.06789	0.0107334	3.81E-13	0.04095162	0	methyl
SCZ	cg25011577	0.0693042	0.0114151	4.02E-13	0.000755575	0	methyl
SCZ	cg13691108	0.127921	0.0190155	4.97E-13	0.009517346	0	methyl
SCZ	cg12073833	0.0838518	0.0131613	5.08E-13	8.35E-07	0	methyl
SCZ	cg24119722	-0.0745898	0.0134782	5.42E-13	0.00156981	0	methyl
SCZ	cg15557168	-0.088736	0.0141863	6.40E-13	0.02195888	0	methyl
SCZ	cg27247225	0.172647	0.0274891	7.69E-13	3.73E-08	0	methyl
SCZ	cg18784558	-0.558457	0.0809931	7.90E-13	0.0039412	0	methyl
SCZ	cg17644776	-0.0339997	0.00957483	8.47E-13	4.28E-11	0	methyl
SCZ	cg13748354	0.042229	0.00795992	1.10E-12	0.005091116	0	methyl
SCZ	cg17545141	-0.0511932	0.0108657	1.13E-12	0.05651206	1	methyl
SCZ	cg26069044	0.0592657	0.00747205	1.16E-12	0.5601982	1	methyl
SCZ	cg09803321	-0.196039	0.028317	1.25E-12	0.1164329	1	methyl
SCZ	cg08213375	0.0931079	0.0131049	1.57E-12	0.001929592	0	methyl
SCZ	cg18711553	-0.121268	0.0260475	1.69E-12	1.08E-07	0	methyl
SCZ	cg17329602	-0.0546776	0.0105499	1.85E-12	0.1262728	1	methyl
SCZ	cg21745287	0.0689561	0.0103682	2.08E-12	0.1233233	1	methyl
SCZ	cg19938535	0.0204477	0.0106676	2.14E-12	0.000153722	0	methyl
SCZ	cg01849466	-0.0570227	0.010749	2.25E-12	8.76E-05	0	methyl
SCZ	cg03723481	-0.0239009	0.00714929	2.32E-12	0.6844811	1	methyl
SCZ	cg25122824	0.0915645	0.0147808	2.34E-12	0.0444465	0	methyl
SCZ	cg12395958	-0.102816	0.0164369	2.51E-12	6.67E-06	0	methyl
SCZ	cg00453258	0.0551969	0.0109288	2.97E-12	0.2265364	1	methyl
SCZ	cg09436713	-0.200288	0.0310018	3.05E-12	0.004691185	0	methyl
SCZ	cg21167502	0.0681974	0.0125818	3.28E-12	0.000194333	0	methyl
SCZ	cg06950937	-0.0585238	0.011455	3.70E-12	0.166212	1	methyl
SCZ	cg05863683	-0.104492	0.0158425	4.38E-12	1.38E-05	0	methyl
SCZ	cg05082376	-0.0972558	0.0156902	4.39E-12	0.02674725	0	methyl
SCZ	cg13165212	0.106781	0.0162177	4.72E-12	0.01130849	0	methyl
SCZ	cg18534077	-0.141464	0.0197732	5.44E-12	0.00013732	0	methyl
SCZ	cg19882886	-0.0323697	0.0131269	5.87E-12	8.90E-08	0	methyl
SCZ	cg12589112	-0.106755	0.0157262	6.03E-12	1.07E-06	0	methyl
SCZ	cg13010344	0.087785	0.0131598	6.83E-12	0.1493887	1	methyl
SCZ	cg19497998	-0.457136	0.0763824	7.59E-12	0.1232342	1	methyl
SCZ	cg06112204	-0.0265984	0.00760482	7.83E-12	0.4873353	1	methyl
SCZ	cg08027265	0.0505261	0.00957277	8.09E-12	0.003131306	0	methyl
SCZ	cg10950524	-0.0368582	0.0099209	8.95E-12	0.00020077	0	methyl
SCZ	cg10030633	-0.0198561	0.00781661	9.82E-12	0.01550491	0	methyl
SCZ	cg17667912	0.0641197	0.0124641	9.86E-12	0.08827265	1	methyl
SCZ	cg21782813	-0.15719	0.0209535	1.11E-11	0.3818376	1	methyl
SCZ	cg26402169	0.0969781	0.0156672	1.21E-11	2.87E-05	0	methyl
SCZ	cg20421295	0.0275734	0.00774983	1.25E-11	0.001802783	0	methyl
SCZ	cg02045355	-0.498049	0.082607	1.26E-11	0.03376045	0	methyl
SCZ	cg12823233	0.0427618	0.00926217	1.30E-11	0.0155584	0	methyl
SCZ	cg07979401	-0.0717397	0.0122702	1.36E-11	0.0923615	1	methyl
SCZ	cg04612667	-0.122272	0.0275914	1.43E-11	9.08E-08	0	methyl
SCZ	cg08607108	-0.164171	0.0229613	1.56E-11	0.2251723	1	methyl
SCZ	cg20185615	0.0474233	0.0100675	1.77E-11	0.004560024	0	methyl
SCZ	cg20735041	0.0516883	0.00848109	1.86E-11	0.000802733	0	methyl
SCZ	cg18319104	0.154924	0.0220878	1.88E-11	0.07951275	1	methyl
SCZ	cg11645453	-0.0491645	0.00889285	2.02E-11	0.00084817	0	methyl
SCZ	cg07679836	0.0703274	0.0124301	2.08E-11	5.91E-07	0	methyl
SCZ	cg25814293	0.103935	0.0169005	2.09E-11	7.03E-05	0	methyl
SCZ	cg15744005	0.0730304	0.00924002	2.58E-11	8.89E-08	0	methyl
SCZ	cg19624444	-0.0349679	0.00980259	2.74E-11	0.5789786	1	methyl
SCZ	cg00035347	0.0799793	0.0107793	2.90E-11	2.46E-07	0	methyl
SCZ	cg13525197	0.208219	0.0322326	3.40E-11	0.005623553	0	methyl
SCZ	cg19487819	0.0649529	0.0119059	3.52E-11	0.1189821	1	methyl
SCZ	cg05227621	0.0341934	0.00864825	3.86E-11	0.000305734	0	methyl
SCZ	cg25116430	-0.0342872	0.00757004	3.99E-11	0.002088064	0	methyl
SCZ	cg25237894	-0.0497705	0.0143663	4.19E-11	2.12E-05	0	methyl
SCZ	cg08772003	0.0829664	0.010604	4.24E-11	2.39E-07	0	methyl
SCZ	cg07644039	0.485842	0.0750433	5.12E-11	0.1133704	1	methyl
SCZ	cg13290180	0.015512	0.00993027	5.76E-11	0.1111604	1	methyl
SCZ	cg23847843	0.243869	0.0403331	5.96E-11	0.02408919	0	methyl
SCZ	cg11050988	0.122324	0.0193453	6.48E-11	1.11E-05	0	methyl
SCZ	cg16778274	0.00565051	0.00870805	7.14E-11	1.33E-08	0	methyl
SCZ	cg21422361	0.0880046	0.0164511	7.24E-11	0.00622913	0	methyl
SCZ	cg05393861	0.0361592	0.00733004	7.92E-11	0.000955311	0	methyl
SCZ	cg08912652	-0.0391296	0.00823109	8.60E-11	0.000111195	0	methyl
SCZ	cg19226100	0.668215	0.111244	8.89E-11	0.04034662	0	methyl
SCZ	cg24849373	0.0104759	0.00750271	9.15E-11	0.1507676	1	methyl
SCZ	cg06266189	-0.14664	0.0232109	9.97E-11	0.001149924	0	methyl
SCZ	cg22340370	0.16257	0.0227983	1.02E-10	0.03495097	0	methyl
SCZ	cg07507251	-0.0601996	0.0110708	1.02E-10	5.36E-05	0	methyl
SCZ	cg07143303	0.155262	0.0241973	1.03E-10	0.000501867	0	methyl
SCZ	cg12537337	-0.0144495	0.00924195	1.09E-10	0.007320178	0	methyl
SCZ	cg19000871	-0.0736401	0.0143866	1.09E-10	1.57E-07	0	methyl
SCZ	cg16492833	0.0755992	0.0143947	1.13E-10	0.02532426	0	methyl
SCZ	cg02474109	0.148779	0.0243513	1.21E-10	0.01712511	0	methyl
SCZ	cg26031613	-0.0458404	0.0100648	1.27E-10	0.005258807	0	methyl
SCZ	cg24886277	-0.204927	0.0582529	1.31E-10	0.001111995	0	methyl
SCZ	cg02256455	0.0617785	0.0131367	1.38E-10	0.07229865	1	methyl
SCZ	cg09682330	0.208619	0.0310337	1.54E-10	0.000209442	0	methyl
SCZ	cg00758881	-0.0860842	0.0160695	1.61E-10	0.04420605	0	methyl
SCZ	cg18005901	-0.0723281	0.0124563	1.67E-10	0.2049622	1	methyl
SCZ	cg17372223	-0.0573517	0.0105226	1.83E-10	9.97E-06	0	methyl
SCZ	cg04484415	-0.0916335	0.0172007	1.86E-10	0.06136018	1	methyl
SCZ	cg18404041	0.0461468	0.00956377	1.94E-10	0.000270924	0	methyl
SCZ	cg22710716	0.0293438	0.00717009	2.01E-10	6.00E-07	0	methyl
SCZ	cg26938255	-0.0780767	0.0151984	2.05E-10	2.23E-07	0	methyl
SCZ	cg17865955	-0.0383303	0.01376	2.14E-10	2.39E-05	0	methyl
SCZ	cg08240539	0.0416149	0.0113849	2.24E-10	0.00129046	0	methyl
SCZ	cg20615401	-0.214823	0.0379859	2.28E-10	0.000591488	0	methyl
SCZ	cg12400864	-0.0211072	0.0086704	2.28E-10	1.24E-09	0	methyl
SCZ	cg05725404	-0.088728	0.0163771	2.37E-10	0.1173051	1	methyl
SCZ	cg21728101	-0.115438	0.0211492	2.39E-10	0.6035442	1	methyl
SCZ	cg18034295	0.122155	0.0217954	2.44E-10	0.01636219	0	methyl
SCZ	cg17700835	0.0768165	0.0264281	2.48E-10	7.02E-16	0	methyl
SCZ	cg11611357	0.0747453	0.0141355	2.67E-10	0.184316	1	methyl
SCZ	cg21251018	-0.349267	0.0587596	2.88E-10	0.561122	1	methyl
SCZ	cg13813247	-0.0543642	0.00908618	2.94E-10	0.02024044	0	methyl
SCZ	cg01436487	0.081938	0.0152394	2.95E-10	0.1254131	1	methyl
SCZ	cg14260648	-0.198999	0.0303328	2.98E-10	0.01516638	0	methyl
SCZ	cg02224795	-0.105878	0.019098	3.22E-10	1.85E-05	0	methyl
SCZ	cg01687878	0.112373	0.0170307	3.71E-10	0.2025397	1	methyl
SCZ	cg22365446	0.104216	0.0199894	4.02E-10	0.1629291	1	methyl
SCZ	cg18279126	-0.241854	0.0354147	4.11E-10	0.5017992	1	methyl
SCZ	cg23378565	0.20627	0.0294175	4.17E-10	0.2380841	1	methyl
SCZ	cg27113419	-0.0849853	0.0156336	4.36E-10	0.1099942	1	methyl
SCZ	cg16010596	-0.110684	0.0191893	4.38E-10	0.2038282	1	methyl
SCZ	cg18815343	0.286926	0.0465442	4.57E-10	0.000717408	0	methyl
SCZ	cg19120225	0.0467848	0.0121577	4.68E-10	5.86E-08	0	methyl
SCZ	cg13447684	-0.138253	0.0233774	4.70E-10	0.00018702	0	methyl
SCZ	cg02264943	-0.0974521	0.0205564	4.71E-10	0.001306588	0	methyl
SCZ	cg14159747	-0.0305899	0.00931426	4.77E-10	0.01816693	0	methyl
SCZ	cg06395469	-0.601748	0.108513	5.35E-10	0.01472727	0	methyl
SCZ	cg12183467	0.0311731	0.0108379	5.37E-10	2.53E-06	0	methyl
SCZ	cg24505687	0.0220826	0.0139675	5.71E-10	3.69E-06	0	methyl
SCZ	cg05564831	-0.0707867	0.0131322	5.75E-10	5.92E-05	0	methyl
SCZ	cg18044113	0.0705318	0.0151534	5.77E-10	0.007370094	0	methyl
SCZ	cg15552206	0.0291664	0.0136458	5.96E-10	2.78E-09	0	methyl
SCZ	cg11131117	-0.0754437	0.0164277	6.05E-10	0.001989234	0	methyl
SCZ	cg23334662	0.102001	0.018529	6.14E-10	0.003693515	0	methyl
SCZ	cg24712290	-0.149194	0.0271786	6.53E-10	0.001964147	0	methyl
SCZ	cg11066209	0.0730563	0.0203057	6.76E-10	0.000348017	0	methyl
SCZ	cg08851530	0.0118982	0.00926979	6.99E-10	0.2214614	1	methyl
SCZ	cg14092988	-0.0406719	0.00921026	7.09E-10	0.00252353	0	methyl
SCZ	cg20866694	0.029423	0.0115211	7.93E-10	0.4723418	1	methyl
SCZ	cg23464183	-0.528256	0.0919602	8.45E-10	0.04673746	0	methyl
SCZ	cg23422866	0.120842	0.015335	8.62E-10	0.009061507	0	methyl
SCZ	cg03078816	0.0139889	0.00932708	8.80E-10	0.1413933	1	methyl
SCZ	cg26580761	-0.123017	0.0208422	8.84E-10	3.84E-05	0	methyl
SCZ	cg26204448	0.0763637	0.0145407	8.94E-10	9.92E-05	0	methyl
SCZ	cg10360139	0.140187	0.0250215	8.94E-10	0.000436052	0	methyl
SCZ	cg10738648	0.0483621	0.00754837	9.06E-10	0.007165879	0	methyl
SCZ	cg01343363	-0.0918689	0.0170105	9.23E-10	0.07964835	1	methyl
SCZ	cg03354898	0.202366	0.0332009	1.11E-09	0.03721691	0	methyl
SCZ	cg05333442	-0.11087	0.0209331	1.15E-09	0.03498917	0	methyl
SCZ	cg00860321	-0.084784	0.0187202	1.15E-09	0.01885017	0	methyl
SCZ	cg11915388	-0.121877	0.0212555	1.16E-09	0.05865143	1	methyl
SCZ	cg25561904	0.0874414	0.0190009	1.21E-09	0.01247859	0	methyl
SCZ	cg06253072	0.0249125	0.0105625	1.22E-09	0.01879855	0	methyl
SCZ	cg14779329	-0.0821395	0.0171339	1.26E-09	0.001389088	0	methyl
SCZ	cg04704449	-0.0515172	0.0130147	1.35E-09	0.000135153	0	methyl
SCZ	cg01579299	-0.0508489	0.0121673	1.35E-09	2.67E-07	0	methyl
SCZ	cg18650626	-0.117614	0.0229368	1.46E-09	0.194434	1	methyl
SCZ	cg07721547	0.140047	0.0259543	1.55E-09	0.02096642	0	methyl
SCZ	cg11545871	0.0378507	0.0161198	1.62E-09	0.008428474	0	methyl
SCZ	cg00631329	0.0138164	0.01018	1.79E-09	6.54E-24	0	methyl
SCZ	cg13511324	0.11747	0.0171695	1.88E-09	0.000449589	0	methyl
SCZ	cg04692870	0.122271	0.0248105	2.03E-09	6.02E-05	0	methyl
SCZ	cg10802521	0.0480778	0.0103838	2.11E-09	1.96E-06	0	methyl
SCZ	cg25643088	0.0824046	0.0151685	2.13E-09	0.005529928	0	methyl
SCZ	cg06742321	-0.139524	0.0224969	2.21E-09	0.08039194	1	methyl
SCZ	cg09975044	-0.0233256	0.0102825	2.25E-09	3.68E-06	0	methyl
SCZ	cg09096031	0.10078	0.0180219	2.32E-09	0.002587376	0	methyl
SCZ	cg18641463	0.0844365	0.0264351	2.37E-09	4.93E-06	0	methyl
SCZ	cg02203224	0.12336	0.0202681	2.41E-09	0.1005028	1	methyl
SCZ	cg23043544	0.0183454	0.0117774	2.41E-09	0.002855742	0	methyl
SCZ	cg23093090	0.0654867	0.0126863	2.41E-09	2.55E-08	0	methyl
SCZ	cg14003231	0.04173	0.0108691	2.47E-09	0.4564337	1	methyl
SCZ	cg22079354	-0.0937454	0.0197335	2.48E-09	0.002687416	0	methyl
SCZ	cg13165778	0.170072	0.0286225	2.52E-09	0.000456838	0	methyl
SCZ	cg11247378	0.0275135	0.00760295	2.53E-09	0.04473127	0	methyl
SCZ	cg23897613	-0.105025	0.0219416	2.57E-09	1.00E-13	0	methyl
SCZ	cg25744355	-0.022552	0.0104206	2.60E-09	0.01880575	0	methyl
SCZ	cg07343703	0.0684731	0.0139398	2.65E-09	0.004038045	0	methyl
SCZ	cg12179176	-0.0995469	0.0208575	2.74E-09	0.000186035	0	methyl
SCZ	cg21859421	0.0406514	0.00799303	2.81E-09	0.000794472	0	methyl
SCZ	cg05872129	0.0310682	0.00859769	2.83E-09	0.01016171	0	methyl
SCZ	cg17658733	-0.598996	0.113104	2.84E-09	0.1474033	1	methyl
SCZ	cg13859433	-0.00036792	0.0112918	2.93E-09	8.50E-08	0	methyl
SCZ	cg24399712	0.031518	0.0083837	3.11E-09	0.05116081	1	methyl
SCZ	cg07071491	0.188233	0.0337922	3.54E-09	0.07287072	1	methyl
SCZ	cg26394850	0.112282	0.0228374	3.76E-09	0.000405526	0	methyl
SCZ	cg18487916	-0.0614013	0.0132249	3.87E-09	4.64E-05	0	methyl
SCZ	cg16880779	-0.121587	0.0270487	4.02E-09	0.000950549	0	methyl
SCZ	cg17593934	-0.0121341	0.00838018	4.32E-09	0.000234651	0	methyl
SCZ	cg21663219	-0.154216	0.0261122	4.57E-09	0.1777749	1	methyl
SCZ	cg00334056	0.00115984	0.0114842	4.65E-09	0.000381348	0	methyl
SCZ	cg01181105	0.106459	0.0233535	4.73E-09	0.001726161	0	methyl
SCZ	cg07355745	0.0876331	0.0244912	4.81E-09	2.62E-16	0	methyl
SCZ	cg04140906	-0.0951067	0.017102	4.98E-09	0.01659843	0	methyl
SCZ	cg20450689	-0.079423	0.0140238	5.19E-09	0.388317	1	methyl
SCZ	cg07065756	-0.069021	0.0213212	5.49E-09	3.76E-08	0	methyl
SCZ	cg08057985	-0.105006	0.019506	6.07E-09	0.000716849	0	methyl
SCZ	cg08796391	0.110356	0.0269283	6.14E-09	0.05265618	1	methyl
SCZ	cg15686782	-0.0120001	0.014183	6.48E-09	0.2253932	1	methyl
SCZ	cg15507776	-0.0393732	0.00924389	6.80E-09	0.002655669	0	methyl
SCZ	cg06864151	-0.248417	0.0432359	7.13E-09	0.09806406	1	methyl
SCZ	cg10259518	0.0187109	0.0139406	7.93E-09	4.28E-06	0	methyl
SCZ	cg00376283	-0.153345	0.025947	8.21E-09	0.1044304	1	methyl
SCZ	cg00317577	0.12566	0.0240075	8.88E-09	0.08141746	1	methyl
SCZ	cg02272667	-0.111169	0.0249302	8.93E-09	0.004319863	0	methyl
SCZ	cg26294955	-0.0256988	0.0100999	9.25E-09	0.00299537	0	methyl
SCZ	cg10489614	0.232551	0.0468945	9.48E-09	0.00285878	0	methyl
SCZ	cg02339392	0.00225322	0.0224186	9.55E-09	1.86E-15	0	methyl
SCZ	cg27470433	0.0259326	0.00936355	9.72E-09	1.93E-05	0	methyl
SCZ	cg05590274	0.0364919	0.0111728	9.78E-09	0.045939	0	methyl
SCZ	cg12017631	-0.0335496	0.0315884	9.86E-09	0.005854787	0	methyl
SCZ	cg25066665	0.0628187	0.0131149	9.88E-09	7.69E-05	0	methyl
SCZ	cg27299047	0.129811	0.0241084	1.03E-08	0.1067436	1	methyl
SCZ	cg06728252	0.0554129	0.0152166	1.07E-08	8.79E-22	0	methyl
SCZ	cg22860607	0.129836	0.0201932	1.09E-08	0.000162827	0	methyl
SCZ	cg19539462	-0.0423153	0.0146108	1.11E-08	0.000825985	0	methyl
SCZ	cg04439374	0.211689	0.0392013	1.12E-08	0.008277953	0	methyl
SCZ	cg11936536	-0.0339038	0.00822705	1.14E-08	0.12389	1	methyl
SCZ	cg27294008	-0.0688072	0.0158727	1.20E-08	6.88E-06	0	methyl
SCZ	cg20565082	0.114123	0.0188369	1.21E-08	0.001125894	0	methyl
SCZ	cg10672416	-0.199878	0.031483	1.28E-08	0.7796534	1	methyl
SCZ	cg05160879	0.0722454	0.0170689	1.28E-08	0.001554401	0	methyl
SCZ	cg03390717	0.111728	0.0356049	1.28E-08	0.005297149	0	methyl
SCZ	cg14597504	0.0856631	0.0191897	1.29E-08	0.00426315	0	methyl
SCZ	cg26272214	0.0748099	0.0170178	1.30E-08	0.001154444	0	methyl
SCZ	cg11001739	-0.135573	0.0287206	1.39E-08	1.20E-06	0	methyl
SCZ	cg05370662	-0.00328046	0.00851176	1.40E-08	5.47E-06	0	methyl
SCZ	cg11912272	-0.0895319	0.023124	1.43E-08	1.75E-05	0	methyl
SCZ	cg00585698	-0.163883	0.0302861	1.44E-08	0.032084	0	methyl
SCZ	cg21787568	0.0806566	0.0187067	1.52E-08	0.1443452	1	methyl
SCZ	cg20505375	0.140149	0.0275088	1.53E-08	0.001547193	0	methyl
SCZ	cg02038168	0.0404135	0.0114002	1.60E-08	0.02342992	0	methyl
SCZ	cg05049822	-0.00788725	0.00873843	1.72E-08	0.00010156	0	methyl
SCZ	cg09137382	-0.0164588	0.0165563	1.83E-08	8.16E-08	0	methyl
SCZ	cg11822372	0.0363097	0.00986171	1.84E-08	0.05232731	1	methyl
SCZ	cg04882995	0.0673278	0.0155698	1.84E-08	0.000807608	0	methyl
SCZ	cg11196182	-0.131819	0.0251383	1.85E-08	0.007712327	0	methyl
SCZ	cg09508730	-0.154552	0.0366209	1.89E-08	1.96E-06	0	methyl
SCZ	cg06882058	-0.0972454	0.0199213	1.98E-08	0.04497671	0	methyl
SCZ	cg21750589	0.407807	0.0789255	2.04E-08	0.1900992	1	methyl
SCZ	cg08650629	-0.120236	0.0227449	2.07E-08	0.000436183	0	methyl
SCZ	cg22081008	0.0752995	0.0222744	2.08E-08	0.001456011	0	methyl
SCZ	cg08505228	-0.130074	0.0211971	2.08E-08	0.7306041	1	methyl
SCZ	cg02743256	-0.0647368	0.0198206	2.15E-08	0.4639058	1	methyl
SCZ	cg17542346	-0.137686	0.0285906	2.17E-08	0.2866977	1	methyl
SCZ	cg21178979	-0.0901846	0.022346	2.24E-08	0.003891227	0	methyl
SCZ	cg01590439	-0.0707835	0.0148362	2.25E-08	0.001777062	0	methyl
SCZ	cg26996890	-0.0223889	0.0210296	2.26E-08	0.004484317	0	methyl
SCZ	cg16894138	-0.0853093	0.0165078	2.31E-08	0.1583739	1	methyl
SCZ	cg01356752	0.00247151	0.00838843	2.35E-08	0.3778389	1	methyl
SCZ	cg21120063	-0.203608	0.0517282	2.40E-08	0.01599632	0	methyl
SCZ	cg05469396	0.165605	0.0297365	2.41E-08	0.06965483	1	methyl
SCZ	cg02736548	-0.147595	0.0265471	2.50E-08	0.07702967	1	methyl
SCZ	cg10116432	0.189441	0.0297675	2.51E-08	0.000194468	0	methyl
SCZ	cg18302629	0.0753233	0.0142771	2.51E-08	2.85E-09	0	methyl
SCZ	cg13798585	-0.14933	0.0297452	2.53E-08	0.3611201	1	methyl
SCZ	cg18187198	0.118646	0.0343906	2.55E-08	3.95E-10	0	methyl
SCZ	cg17266963	-0.0804828	0.0149571	2.55E-08	0.02619613	0	methyl
SCZ	cg13550401	0.0597462	0.0205415	2.63E-08	0.00127084	0	methyl
SCZ	cg12185399	-0.718855	0.132237	2.63E-08	0.01041256	0	methyl
SCZ	cg21913888	-0.079617	0.0146923	2.68E-08	0.00392618	0	methyl
SCZ	cg00395296	0.183432	0.0385326	2.75E-08	0.000197576	0	methyl
SCZ	cg16399833	-0.0207037	0.0202114	2.82E-08	0.004483391	0	methyl
SCZ	cg11596043	-0.0336428	0.0135965	3.01E-08	1.07E-06	0	methyl
SCZ	cg01726073	0.0635363	0.0164691	3.06E-08	0.000176377	0	methyl
SCZ	cg18457491	-0.346751	0.0731455	3.14E-08	0.3417022	1	methyl
SCZ	cg04396112	-0.0620986	0.0144282	3.15E-08	0.3910124	1	methyl
SCZ	cg13879655	0.0812234	0.0159087	3.24E-08	1.05E-05	0	methyl
SCZ	cg15439196	-0.293506	0.0567988	3.27E-08	0.01369857	0	methyl
SCZ	cg24530246	0.0432918	0.0112385	3.40E-08	0.2078678	1	methyl
SCZ	cg22532475	-0.0309113	0.0121508	3.46E-08	0.000809358	0	methyl
SCZ	cg13775306	0.0889363	0.0243084	3.53E-08	0.04385307	0	methyl
SCZ	cg10309769	-0.261309	0.0525831	3.58E-08	0.01973729	0	methyl
SCZ	cg22484793	-0.0837147	0.018347	3.61E-08	0.0134727	0	methyl
SCZ	cg10727673	0.0547299	0.0129363	3.75E-08	0.04965504	0	methyl
SCZ	cg26027576	0.1543	0.0280876	3.75E-08	0.06567199	1	methyl
SCZ	cg12870014	-0.0290079	0.00861065	3.95E-08	0.000529356	0	methyl
SCZ	cg12274030	-0.254328	0.0508457	3.95E-08	0.01386826	0	methyl
SCZ	cg21827317	-0.0384045	0.00992499	3.97E-08	0.06621332	1	methyl
SCZ	cg16497661	0.0602333	0.0181227	4.08E-08	0.009026644	0	methyl
SCZ	cg17445625	-0.047726	0.0153119	4.11E-08	6.40E-06	0	methyl
SCZ	cg08069931	-0.209154	0.0391141	4.17E-08	0.7956399	1	methyl
SCZ	cg19858082	-0.19799	0.036245	4.28E-08	0.02112338	0	methyl
SCZ	cg22101147	-0.0822524	0.0189907	4.37E-08	9.24E-08	0	methyl
SCZ	cg13677785	-0.181338	0.032735	4.49E-08	0.2984458	1	methyl
SCZ	cg25247409	-0.279628	0.0531997	4.58E-08	0.01279185	0	methyl
SCZ	cg01416388	0.0360593	0.0103633	4.74E-08	0.03139144	0	methyl
SCZ	cg23090046	-0.235172	0.0410185	4.76E-08	0.1271233	1	methyl
SCZ	cg07095346	-0.111956	0.021413	4.82E-08	0.007261961	0	methyl
SCZ	cg23048001	-0.27002	0.0498133	4.92E-08	0.04799273	0	methyl
SCZ	cg11972305	-0.238141	0.0429984	5.00E-08	0.006910446	0	methyl
SCZ	cg00989904	-0.0248611	0.00892029	5.28E-08	0.6075388	1	methyl
SCZ	cg12757570	-0.137041	0.0257016	5.29E-08	0.008654176	0	methyl
SCZ	cg09217878	0.166846	0.031137	5.32E-08	0.01344733	0	methyl
SCZ	cg08176694	0.176361	0.0329359	5.35E-08	0.01557657	0	methyl
SCZ	cg25143771	-0.373992	0.0777698	5.68E-08	0.5330029	1	methyl
SCZ	cg19116814	0.160768	0.0500811	5.71E-08	0.02630715	0	methyl
SCZ	cg06330618	-0.189315	0.0369169	6.05E-08	0.08702064	1	methyl
SCZ	cg20147224	-0.0251323	0.00762995	6.34E-08	0.006255696	0	methyl
SCZ	cg02546618	0.149163	0.0290166	6.40E-08	0.0110948	0	methyl
SCZ	cg16772998	-0.0927303	0.02926	6.41E-08	2.22E-05	0	methyl
SCZ	cg12376829	0.10075	0.019076	6.70E-08	0.1382799	1	methyl
SCZ	cg12473912	-0.0432288	0.0114057	6.73E-08	0.05094766	1	methyl
SCZ	cg01329511	0.0562968	0.0175137	6.79E-08	0.1318376	1	methyl
SCZ	cg04131194	-0.0400597	0.00865186	6.80E-08	0.2045025	1	methyl
SCZ	cg25276610	0.109116	0.0315499	7.30E-08	5.28E-12	0	methyl
SCZ	cg00546117	-0.0557706	0.0100352	7.69E-08	0.07698636	1	methyl
SCZ	cg14106933	0.067913	0.024475	7.76E-08	8.33E-06	0	methyl
SCZ	cg05829145	0.173764	0.0404345	7.77E-08	0.001610999	0	methyl
SCZ	cg04189591	-0.0996737	0.0264064	7.85E-08	0.01570222	0	methyl
SCZ	cg11312108	0.098445	0.0307515	7.89E-08	1.82E-05	0	methyl
SCZ	cg15407162	0.308879	0.0670801	8.03E-08	0.005319139	0	methyl
SCZ	cg05876883	-0.030133	0.00735859	8.08E-08	0.02486083	0	methyl
SCZ	cg09742952	0.256712	0.0598016	8.15E-08	0.1491928	1	methyl
SCZ	cg11677105	0.0140448	0.0126481	8.28E-08	1.34E-05	0	methyl
SCZ	cg04865290	0.0308634	0.00942863	8.29E-08	0.01628074	0	methyl
SCZ	cg01302853	0.172623	0.0307919	8.33E-08	0.01259385	0	methyl
SCZ	cg19486271	0.0628225	0.019481	8.66E-08	0.000444902	0	methyl
SCZ	cg18825076	-0.0454448	0.0104888	8.91E-08	0.002619475	0	methyl
SCZ	cg08465311	0.00769281	0.00908767	9.23E-08	0.1194426	1	methyl
SCZ	cg04510874	-0.174621	0.0333951	9.31E-08	0.02025126	0	methyl
SCZ	cg25259697	-0.127544	0.0260929	9.55E-08	0.00307639	0	methyl
SCZ	cg26467949	0.0306302	0.00941369	9.58E-08	0.01356884	0	methyl
SCZ	cg17498424	-0.205707	0.0403783	9.65E-08	0.329435	1	methyl
SCZ	cg16396933	0.238185	0.0435063	9.67E-08	0.000473894	0	methyl
SCZ	cg13736514	0.0144582	0.0106541	9.77E-08	2.46E-23	0	methyl
SCZ	cg19315261	0.0804084	0.0183842	1.00E-07	0.000749836	0	methyl
SCZ	cg17618327	-0.0117968	0.0139425	1.06E-07	0.2074422	1	methyl
SCZ	cg21598190	0.00475302	0.00744073	1.07E-07	0.5690744	1	methyl
SCZ	cg06789500	-0.0566464	0.0173145	1.10E-07	0.2923847	1	methyl
SCZ	cg22699026	0.244191	0.0585641	1.12E-07	0.02812089	0	methyl
SCZ	cg10515131	-0.13649	0.027032	1.14E-07	0.262047	1	methyl
SCZ	cg07838603	0.342153	0.0665271	1.18E-07	0.01750409	0	methyl
SCZ	cg06294321	0.0680244	0.0117535	1.23E-07	0.4463078	1	methyl
SCZ	cg04898039	-0.0775038	0.0174483	1.23E-07	0.4009227	1	methyl
SCZ	cg16387141	-0.102006	0.0303853	1.25E-07	2.76E-09	0	methyl
SCZ	cg24893378	-0.0188443	0.010952	1.28E-07	2.86E-05	0	methyl
SCZ	cg25418670	-0.0603593	0.0133176	1.30E-07	0.003255814	0	methyl
SCZ	cg06015834	0.113248	0.0209113	1.31E-07	0.005966997	0	methyl
SCZ	cg21479132	-0.500231	0.0917304	1.31E-07	5.69E-07	0	methyl
SCZ	cg26002218	0.0652831	0.021086	1.33E-07	0.0125887	0	methyl
SCZ	cg01931994	0.0918505	0.0220754	1.35E-07	0.001229392	0	methyl
SCZ	cg22341471	-0.219009	0.0405741	1.36E-07	0.146733	1	methyl
SCZ	cg26396443	-0.114038	0.028302	1.39E-07	0.009466088	0	methyl
SCZ	cg10712668	0.102577	0.0244872	1.41E-07	0.000845547	0	methyl
SCZ	cg12488919	-0.0714496	0.0162194	1.42E-07	0.000354169	0	methyl
SCZ	cg04194840	0.180435	0.035133	1.43E-07	0.007192286	0	methyl
SCZ	cg10276465	-0.173866	0.032507	1.45E-07	0.1037268	1	methyl
SCZ	cg09906309	-0.0880398	0.0200349	1.46E-07	0.003743029	0	methyl
SCZ	cg00364051	-0.115199	0.0333247	1.52E-07	0.03562757	0	methyl
SCZ	cg04074945	0.0412647	0.0125441	1.54E-07	0.2309879	1	methyl
SCZ	cg06850241	-0.0255414	0.0130337	1.54E-07	0.000407786	0	methyl
SCZ	cg20788561	-0.0589057	0.0102461	1.60E-07	0.2472704	1	methyl
SCZ	cg27131891	0.628546	0.122158	1.60E-07	0.2624623	1	methyl
SCZ	cg20765441	0.0395034	0.0134048	1.62E-07	0.000198197	0	methyl
SCZ	cg05914723	-0.0807709	0.0177111	1.65E-07	0.173644	1	methyl
SCZ	cg03326252	-0.102067	0.0220399	1.70E-07	0.003816825	0	methyl
SCZ	cg22156842	0.0598063	0.015117	1.73E-07	0.1684843	1	methyl
SCZ	cg17866778	-0.109908	0.0201825	1.73E-07	8.30E-07	0	methyl
SCZ	cg07836142	0.372064	0.0744627	1.74E-07	0.001431146	0	methyl
SCZ	cg03328639	-0.230794	0.0459657	1.76E-07	0.3522704	1	methyl
SCZ	cg25753631	-0.0495679	0.0177861	1.78E-07	0.002660513	0	methyl
SCZ	cg04803944	0.0821177	0.0160848	1.84E-07	3.22E-06	0	methyl
SCZ	cg16047117	-0.155512	0.0308552	1.91E-07	0.000622581	0	methyl
SCZ	cg02887458	-0.0580832	0.0127983	1.95E-07	0.000175316	0	methyl
SCZ	cg00421144	0.0376766	0.013069	1.97E-07	0.1135589	1	methyl
SCZ	cg16436711	0.0113906	0.0149633	1.99E-07	0.03976979	0	methyl
SCZ	cg24977886	-0.145951	0.0285514	2.05E-07	3.82E-06	0	methyl
SCZ	cg16740427	-0.149426	0.0293823	2.07E-07	0.001109709	0	methyl
SCZ	cg26902026	-0.194038	0.0465882	2.07E-07	0.05456568	1	methyl
SCZ	cg02246640	-0.344331	0.06709	2.10E-07	0.05548495	1	methyl
SCZ	cg14318858	0.0372034	0.0124794	2.11E-07	7.18E-06	0	methyl
SCZ	cg12908607	0.0378176	0.0091663	2.13E-07	0.006917827	0	methyl
SCZ	cg13127506	-0.306374	0.0577114	2.16E-07	0.606741	1	methyl
SCZ	cg12922093	0.0891011	0.0224662	2.17E-07	0.01407091	0	methyl
SCZ	cg11277662	-0.0257049	0.0142504	2.18E-07	0.000450465	0	methyl
SCZ	cg10172584	-0.0969819	0.0230238	2.18E-07	3.21E-05	0	methyl
SCZ	cg20188733	-0.0645938	0.0162072	2.23E-07	0.002944768	0	methyl
SCZ	cg12492273	-0.10512	0.033589	2.25E-07	6.96E-06	0	methyl
SCZ	cg11519708	0.0138225	0.00777822	2.31E-07	0.7231604	1	methyl
SCZ	cg04342202	0.0301035	0.0214838	2.33E-07	0.1493442	1	methyl
SCZ	cg00700324	0.213751	0.045794	2.34E-07	0.0259685	0	methyl
SCZ	cg26386464	0.1289	0.0262239	2.40E-07	0.00934204	0	methyl
SCZ	cg13348458	0.120002	0.0348012	2.40E-07	8.35E-09	0	methyl
SCZ	cg23369564	0.159356	0.0293177	2.43E-07	0.1654652	1	methyl
SCZ	cg26732615	0.108749	0.0173431	2.44E-07	0.02856893	0	methyl
SCZ	cg22460466	-0.271352	0.0511741	2.53E-07	0.01597073	0	methyl
SCZ	cg18212064	-0.0325426	0.0329008	2.61E-07	0.000106118	0	methyl
SCZ	cg27211408	-0.0312052	0.0158584	2.61E-07	0.001433695	0	methyl
SCZ	cg23266546	-0.762209	0.148023	2.61E-07	0.01426132	0	methyl
SCZ	cg17042849	-0.0148622	0.0116799	2.68E-07	0.06020781	1	methyl
SCZ	cg07973591	0.0153435	0.0158336	2.86E-07	7.61E-06	0	methyl
SCZ	cg13246856	-0.0606844	0.0149182	2.88E-07	0.02482294	0	methyl
SCZ	cg07811498	0.252905	0.0508793	2.95E-07	0.2317825	1	methyl
SCZ	cg11713064	0.030095	0.0100323	2.95E-07	1.32E-06	0	methyl
SCZ	cg23127183	-0.159093	0.0302812	2.98E-07	0.6605327	1	methyl
SCZ	cg05991220	0.119836	0.0276746	2.99E-07	0.002338164	0	methyl
SCZ	cg23422044	-0.0187834	0.0129881	2.99E-07	0.000269513	0	methyl
SCZ	cg16104450	0.155099	0.035882	3.00E-07	0.005836505	0	methyl
SCZ	cg04593460	-0.330404	0.0665469	3.01E-07	0.3476062	1	methyl
SCZ	cg19450111	-0.110718	0.0273799	3.04E-07	0.004780927	0	methyl
SCZ	cg01320540	-0.588643	0.114953	3.04E-07	0.4103797	1	methyl
SCZ	cg01119831	-0.0864448	0.0270997	3.14E-07	3.33E-06	0	methyl
SCZ	cg24201033	0.0398298	0.0133729	3.18E-07	2.33E-05	0	methyl
SCZ	cg02036364	0.00446259	0.0102788	3.25E-07	1.01E-07	0	methyl
SCZ	cg18734877	0.0729505	0.0160153	3.32E-07	0.09128322	1	methyl
SCZ	cg06334689	0.0428097	0.00750988	3.36E-07	0.004000077	0	methyl
SCZ	cg27473871	0.194245	0.0394125	3.38E-07	0.01536325	0	methyl
SCZ	cg24888049	0.00943319	0.0122583	3.52E-07	4.23E-09	0	methyl
SCZ	cg22617819	0.0431969	0.00998963	3.60E-07	0.05274404	1	methyl
SCZ	cg03719032	0.102032	0.019435	3.62E-07	0.008651872	0	methyl
SCZ	cg22496996	-0.102038	0.0212479	3.66E-07	3.55E-17	0	methyl
SCZ	cg24890104	0.076612	0.0236585	3.75E-07	5.93E-12	0	methyl
SCZ	cg22694191	-0.139653	0.033779	3.91E-07	0.004162739	0	methyl
SCZ	cg16513277	0.0614701	0.0131814	4.06E-07	0.002264664	0	methyl
SCZ	cg20803211	-0.332807	0.0632338	4.07E-07	0.002207079	0	methyl
SCZ	cg11124135	0.0406004	0.0078827	4.11E-07	0.01198453	0	methyl
SCZ	cg03122926	0.0270931	0.00752543	4.22E-07	0.004048163	0	methyl
SCZ	cg04733989	-0.1866	0.0366369	4.25E-07	0.02961839	0	methyl
SCZ	cg14841828	-0.112051	0.0277732	4.34E-07	0.003172503	0	methyl
SCZ	cg08712631	0.0330491	0.0224656	4.36E-07	0.01897639	0	methyl
SCZ	cg16427983	-0.213524	0.0418195	4.51E-07	0.04699844	0	methyl
SCZ	cg05636881	-0.0701172	0.0166665	4.60E-07	2.67E-05	0	methyl
SCZ	cg15686393	-0.116819	0.0266508	4.70E-07	0.03434666	0	methyl
SCZ	cg25352836	0.0901199	0.020355	4.70E-07	8.65E-05	0	methyl
SCZ	cg03269368	0.222009	0.0450826	4.72E-07	0.07726061	1	methyl
SCZ	cg02311337	0.313661	0.062914	4.74E-07	0.06122874	1	methyl
SCZ	cg14449575	-0.083255	0.0194897	4.78E-07	0.003257606	0	methyl
SCZ	cg15656257	-0.257601	0.0561762	4.96E-07	0.2563991	1	methyl
SCZ	cg10869957	-0.0971241	0.0239268	4.97E-07	0.005090814	0	methyl
SCZ	cg16591659	-0.039942	0.0115182	5.02E-07	0.000749348	0	methyl
SCZ	cg14205632	0.0248851	0.0105512	5.05E-07	0.05944782	1	methyl
SCZ	cg16389456	0.216875	0.042791	5.06E-07	0.02210685	0	methyl
SCZ	cg01178603	-0.0447956	0.049392	5.08E-07	0.02295189	0	methyl
SCZ	cg08928145	0.123206	0.0294526	5.08E-07	0.002175498	0	methyl
SCZ	cg04502620	0.0868247	0.0192091	5.12E-07	0.002292463	0	methyl
SCZ	cg13759905	-0.100465	0.020533	5.22E-07	9.08E-09	0	methyl
SCZ	cg20627046	0.000107597	0.0130267	5.33E-07	2.18E-08	0	methyl
SCZ	cg13364410	-0.13575	0.0320239	5.36E-07	0.01076311	0	methyl
SCZ	cg04809988	0.026971	0.0138318	5.36E-07	0.001053173	0	methyl
SCZ	cg13523818	0.0897438	0.0198384	5.38E-07	0.000801668	0	methyl
SCZ	cg06134964	0.0107501	0.0151276	5.45E-07	9.61E-06	0	methyl
SCZ	cg15918732	-0.125623	0.0311864	5.48E-07	0.008012019	0	methyl
SCZ	cg25824828	-0.228706	0.0479051	5.54E-07	1.77E-05	0	methyl
SCZ	cg26740109	-0.061486	0.0107164	5.60E-07	0.1525165	1	methyl
SCZ	cg21155852	-0.279769	0.0637844	5.63E-07	0.00501507	0	methyl
SCZ	cg15598425	0.0346423	0.0110502	5.69E-07	0.04443065	0	methyl
PD	cg27060340	0.169454	0.0213851	2.29E-15	0.001263654	0	methyl
PD	cg22968622	-0.152181	0.0171413	3.68E-15	3.87E-06	0	methyl
PD	cg00846647	0.210201	0.0234321	4.91E-15	2.37E-06	0	methyl
PD	cg05159804	0.20929	0.023982	5.09E-15	3.81E-05	0	methyl
PD	cg16228356	0.273609	0.0313481	6.33E-15	7.40E-05	0	methyl
PD	cg18228076	0.168137	0.0183873	7.29E-15	7.05E-06	0	methyl
PD	cg17117718	-0.166241	0.0178925	7.42E-15	1.64E-06	0	methyl
PD	cg19832721	-0.180655	0.0204008	8.40E-15	2.99E-05	0	methyl
PD	cg08113562	-0.172281	0.0217379	1.06E-14	0.000318915	0	methyl
PD	cg02228913	0.172638	0.0185621	1.24E-14	0.000355787	0	methyl
PD	cg07368061	0.298435	0.0345881	1.67E-14	1.63E-05	0	methyl
PD	cg24801230	0.156558	0.0170358	1.69E-14	1.00E-05	0	methyl
PD	cg18878992	-0.322333	0.0374391	3.25E-14	0.000137891	0	methyl
PD	cg09764761	0.332258	0.0394373	4.46E-14	0.000744323	0	methyl
PD	cg21705961	0.340957	0.0403683	5.20E-14	0.002368768	0	methyl
PD	cg00891649	0.346337	0.0416107	9.76E-14	0.000178035	0	methyl
PD	cg15295732	0.349998	0.0420866	1.12E-13	1.05E-05	0	methyl
PD	cg23762722	0.387721	0.0474775	2.74E-13	0.06324297	1	methyl
PD	cg24477401	0.294359	0.0396565	3.53E-13	0.002463577	0	methyl
PD	cg13133387	0.0552391	0.0163131	4.53E-13	2.07E-11	0	methyl
PD	cg01934064	-0.419139	0.0549651	7.25E-13	0.000111968	0	methyl
PD	cg01882395	-0.440091	0.0556806	1.26E-12	9.61E-05	0	methyl
PD	cg16520312	0.42342	0.0528767	1.28E-12	0.000120311	0	methyl
PD	cg01966878	-0.0714468	0.0223332	1.75E-12	1.83E-18	0	methyl
PD	cg05301556	0.447199	0.0576589	1.88E-12	1.24E-05	0	methyl
PD	cg08670715	-0.529467	0.070707	2.44E-12	6.38E-07	0	methyl
PD	cg03954353	-0.49803	0.0655315	5.27E-12	2.17E-05	0	methyl
PD	cg05727186	0.506599	0.06754	1.12E-11	9.98E-05	0	methyl
PD	cg09279566	-0.124279	0.0237514	1.94E-11	0.000122103	0	methyl
PD	cg15105011	-0.11788	0.0224298	3.86E-11	0.008440966	0	methyl
PD	cg02070118	0.495391	0.0721195	4.33E-11	0.6479261	1	methyl
PD	cg14202850	-0.565515	0.0799896	4.72E-11	0.001928245	0	methyl
PD	cg18586891	0.236048	0.0412681	5.26E-11	0.004839926	0	methyl
PD	cg02665463	-0.0646308	0.0244179	8.19E-11	1.24E-10	0	methyl
PD	cg11936536	-0.0748422	0.0142987	1.25E-10	0.000162557	0	methyl
PD	cg20814179	-0.102973	0.0195019	1.53E-10	0.006638	0	methyl
PD	cg23202277	-0.558183	0.0820831	2.08E-10	0.1171783	1	methyl
PD	cg05251861	-0.0444404	0.0245843	2.51E-10	3.94E-10	0	methyl
PD	cg25790212	-0.100136	0.0192678	2.68E-10	5.41E-05	0	methyl
PD	cg27589368	0.599239	0.0928274	3.39E-10	0.000819726	0	methyl
PD	cg08222618	-0.103482	0.0196051	3.46E-10	0.00386215	0	methyl
PD	cg12798194	0.0594342	0.0335888	4.71E-10	1.15E-09	0	methyl
PD	cg06067394	-0.094366	0.0327048	4.79E-10	0.01069246	0	methyl
PD	cg19961173	-0.111582	0.0316041	6.21E-10	0.01438832	0	methyl
PD	cg01437235	-0.183139	0.0360859	6.48E-10	0.01008769	0	methyl
PD	cg15138543	0.0443218	0.0157098	7.63E-10	4.78E-12	0	methyl
PD	cg08765940	-0.115063	0.0330707	9.53E-10	0.04297376	0	methyl
PD	cg27503360	0.367915	0.0747566	1.09E-09	0.001436736	0	methyl
PD	cg11489262	-0.601072	0.092228	1.14E-09	0.000188183	0	methyl
PD	cg03392386	-0.131355	0.0256382	1.32E-09	0.000256359	0	methyl
PD	cg05721485	-0.639858	0.0950338	1.52E-09	0.00078453	0	methyl
PD	cg03642635	-0.115871	0.0303941	1.56E-09	0.003077119	0	methyl
PD	cg23659289	-0.677231	0.102521	1.61E-09	0.000633863	0	methyl
PD	cg00480298	-0.70438	0.110347	2.27E-09	0.000122238	0	methyl
PD	cg12362517	-0.281945	0.0568597	2.31E-09	0.00314323	0	methyl
PD	cg00846425	-0.199963	0.0352152	3.04E-09	1.35E-06	0	methyl
PD	cg04491389	0.631259	0.100193	3.42E-09	0.003856081	0	methyl
PD	cg08395784	-0.0314794	0.0160365	3.69E-09	0.000351479	0	methyl
PD	cg06157924	0.0912659	0.0172204	3.77E-09	0.001235079	0	methyl
PD	cg23616531	0.239441	0.0787591	4.74E-09	3.86E-05	0	methyl
PD	cg24158141	-0.210545	0.0384743	5.10E-09	0.009258028	0	methyl
PD	cg06632027	-0.297912	0.0310568	5.14E-09	1.40E-12	0	methyl
PD	cg27509693	-0.217812	0.0465256	6.66E-09	0.4810449	1	methyl
PD	cg14530993	0.197049	0.0374663	8.26E-09	3.62E-07	0	methyl
PD	cg12604352	0.752292	0.120302	8.71E-09	0.000523165	0	methyl
PD	cg21092324	0.532683	0.104873	1.06E-08	0.06252293	1	methyl
PD	cg18057887	-0.200319	0.0407054	1.08E-08	0.01711494	0	methyl
PD	cg01572696	-0.0400383	0.0421357	1.21E-08	0.000111552	0	methyl
PD	cg05667917	0.0312833	0.0171976	1.33E-08	7.06E-14	0	methyl
PD	cg12548348	-0.568992	0.0928727	1.54E-08	0.02712123	0	methyl
PD	cg21214508	0.600848	0.102698	1.58E-08	5.03E-06	0	methyl
PD	cg21616051	0.0367544	0.0210328	1.59E-08	2.61E-07	0	methyl
PD	cg00247629	-0.487929	0.122202	2.00E-08	0.05213469	1	methyl
PD	cg02220965	0.139515	0.0277647	2.06E-08	0.007315752	0	methyl
PD	cg23992470	0.228467	0.0443025	2.26E-08	7.54E-07	0	methyl
PD	cg14374015	-0.816454	0.141793	2.34E-08	0.000240645	0	methyl
PD	cg24063856	0.798166	0.130242	2.49E-08	0.01253115	0	methyl
PD	cg15133208	-0.299192	0.0311478	2.99E-08	5.40E-13	0	methyl
PD	cg05772917	-0.832227	0.139719	3.21E-08	0.001107993	0	methyl
PD	cg19408572	-0.110493	0.0196005	3.22E-08	0.001644874	0	methyl
PD	cg15086884	0.222693	0.0448031	3.24E-08	0.1042465	1	methyl
PD	cg07584200	-0.19784	0.04844	3.27E-08	0.000288502	0	methyl
PD	cg17736285	0.598656	0.111437	3.63E-08	0.01238933	0	methyl
PD	cg10224600	-0.789168	0.132521	3.65E-08	0.2790191	1	methyl
PD	cg21835780	-0.00753485	0.0213691	4.67E-08	7.22E-10	0	methyl
PD	cg14346243	-0.367964	0.0408903	4.73E-08	1.41E-10	0	methyl
PD	cg09216008	-0.40137	0.092777	5.34E-08	0.009309811	0	methyl
PD	cg03417975	-0.930049	0.168627	6.24E-08	0.09405019	1	methyl
PD	cg11107149	-0.237787	0.0477166	6.51E-08	0.01001869	0	methyl
PD	cg07067577	0.628894	0.106748	6.71E-08	0.009017251	0	methyl
PD	cg09755872	0.201034	0.0366486	6.93E-08	0.4638462	1	methyl
PD	cg05768032	-0.0853567	0.0210241	7.53E-08	0.000154546	0	methyl
PD	cg04220779	-0.0091615	0.0259837	7.94E-08	2.21E-07	0	methyl
PD	cg16642545	1.02492	0.192032	8.43E-08	0.000818747	0	methyl
PD	cg07828340	0.210018	0.036582	8.43E-08	7.69E-06	0	methyl
PD	cg03418659	0.145651	0.0290972	9.26E-08	0.002508634	0	methyl
PD	cg02214698	-0.0550474	0.0171027	9.33E-08	6.74E-06	0	methyl
PD	cg05178683	-0.350663	0.062489	9.95E-08	0.02987631	0	methyl
PD	cg12601576	-0.29479	0.0552853	1.06E-07	4.72E-05	0	methyl
PD	cg02301815	0.299062	0.102831	1.27E-07	0.000163555	0	methyl
PD	cg10486069	0.0832914	0.0251782	1.39E-07	0.004974471	0	methyl
PD	cg27494429	-0.486581	0.107127	1.47E-07	0.07626291	1	methyl
PD	cg20003494	-0.432288	0.0507759	1.54E-07	6.65E-11	0	methyl
PD	cg08862499	0.987151	0.177225	1.55E-07	0.000405776	0	methyl
PD	cg02466173	0.147813	0.0301935	1.56E-07	0.000750106	0	methyl
PD	cg26300313	0.135309	0.0257203	1.64E-07	5.43E-06	0	methyl
PD	cg05602783	0.14591	0.029323	1.69E-07	0.04661481	0	methyl
PD	cg20916646	-0.135472	0.0298665	1.77E-07	1.12E-06	0	methyl
PD	cg11117266	0.967816	0.176522	1.78E-07	0.001870885	0	methyl
PD	cg13732302	0.942516	0.180368	1.85E-07	0.000870415	0	methyl
PD	cg25932599	0.0206173	0.0185661	1.95E-07	3.59E-06	0	methyl
PD	cg12105941	0.104909	0.0319026	2.21E-07	0.01769001	0	methyl
PD	cg20456258	-0.102278	0.0190386	2.25E-07	0.002942897	0	methyl
PD	cg07163735	-0.810335	0.147269	2.38E-07	0.00549726	0	methyl
PD	cg01345055	0.00467201	0.01837	2.42E-07	0.000825426	0	methyl
PD	cg09153458	0.0957024	0.0353035	2.43E-07	1.59E-13	0	methyl
PD	cg26855231	-0.255969	0.0999357	2.61E-07	0.001894197	0	methyl
PD	cg04018474	-0.198844	0.0432899	2.62E-07	0.006832234	0	methyl
PD	cg03575189	0.870445	0.176066	2.72E-07	0.04309917	0	methyl
PD	cg02262221	0.121939	0.0410981	3.09E-07	2.82E-05	0	methyl
PD	cg22718636	-0.110671	0.0206635	3.36E-07	0.00231421	0	methyl
PD	cg27457921	-0.628832	0.141399	3.48E-07	0.009542574	0	methyl
PD	cg11395954	0.0918207	0.0278191	3.64E-07	0.004959283	0	methyl
PD	cg21327887	-0.881306	0.168789	3.78E-07	0.003473264	0	methyl
PD	cg16185996	-0.109403	0.0415352	4.12E-07	0.000581335	0	methyl
PD	cg03134962	-0.149019	0.0315703	4.12E-07	3.63E-05	0	methyl
PD	cg18410271	-1.03485	0.200147	4.19E-07	0.00957611	0	methyl
PD	cg01067137	0.159944	0.0343344	4.25E-07	4.55E-05	0	methyl
PD	cg22659356	0.309784	0.0712241	4.41E-07	0.08800387	1	methyl
PD	cg07404961	-0.377437	0.0888569	5.09E-07	0.1430323	1	methyl
PD	cg13941682	-0.0250297	0.0175131	5.27E-07	0.01380985	0	methyl
PD	cg20311846	-0.0911257	0.0201494	5.31E-07	0.02241869	0	methyl
PD	cg11909912	-1.03241	0.206365	5.55E-07	0.1464477	1	methyl
AN	cg14798641	0.0949779	0.014163	3.38E-12	0.000716226	0	methyl
AN	cg05126514	0.0499887	0.0100705	1.14E-10	1.91E-05	0	methyl
AN	cg00383909	-0.187679	0.0291532	2.52E-10	0.002215164	0	methyl
AN	cg13063704	-0.246126	0.0400413	4.30E-09	0.04820322	0	methyl
AN	cg06313718	0.0911195	0.0189362	4.67E-09	0.000610699	0	methyl
AN	cg05785598	0.106391	0.0227981	5.58E-09	0.000121295	0	methyl
AN	cg07308293	0.242862	0.0386208	8.32E-09	0.02503374	0	methyl
AN	cg07274523	0.0919673	0.0214019	1.27E-08	0.000442754	0	methyl
AN	cg21612339	0.0552277	0.0139426	1.48E-08	0.01209218	0	methyl
AN	cg21444500	-0.0344245	0.0132347	1.77E-08	0.009024019	0	methyl
AN	cg05767306	-0.0830403	0.0173031	1.81E-08	0.01671722	0	methyl
AN	cg16323609	-0.300572	0.0495098	2.85E-08	0.2028953	1	methyl
AN	cg01304814	-0.317232	0.0547443	6.50E-08	0.08114716	1	methyl
AN	cg19472611	-0.344856	0.0618254	1.06E-07	0.3401552	1	methyl
AN	cg19095143	-0.170496	0.0450839	2.42E-07	0.03881886	0	methyl
AN	cg04055981	0.0975253	0.0252156	4.96E-07	0.4112269	1	methyl
BP	cg03885818	-0.0738956	0.0154945	4.85E-08	0.05123762	1	methyl
BP	cg14470998	0.154975	0.0329612	1.01E-07	0.4883411	1	methyl
BP	cg25643088	0.0863614	0.021168	1.29E-07	0.000139755	0	methyl
BP	cg11645453	-0.0523083	0.0125392	1.30E-07	8.80E-05	0	methyl
BP	cg06302806	-0.110895	0.0258372	1.31E-07	0.08046135	1	methyl
BP	cg20735041	0.0648062	0.0119423	1.61E-07	0.04272638	0	methyl
BP	cg14092988	-0.0549101	0.0130949	1.95E-07	0.002475552	0	methyl
BP	cg06407657	0.0369235	0.0117711	2.53E-07	0.02401447	0	methyl
BP	cg05393861	0.0459449	0.010289	2.56E-07	0.000352017	0	methyl
BP	cg27176129	0.0367166	0.011704	2.79E-07	0.009095713	0	methyl
BP	cg18404041	0.0592622	0.0135108	3.08E-07	0.000155406	0	methyl
BP	cg17372223	-0.0589927	0.0147132	3.11E-07	1.04E-06	0	methyl
BP	cg22237644	-0.0447329	0.0127503	3.23E-07	0.001955892	0	methyl
BP	cg18487916	-0.0934257	0.0186221	3.38E-07	0.02587755	0	methyl
BP	cg22866937	0.0553164	0.0144892	3.49E-07	0.04576773	0	methyl
BP	cg07507251	-0.0619221	0.0154633	3.62E-07	4.95E-06	0	methyl
BP	cg16667508	0.0381325	0.0121604	4.10E-07	0.05283745	1	methyl
BP	cg16640973	0.10193	0.0207189	4.31E-07	0.003121197	0	methyl
BP	cg10802521	0.0734386	0.0145982	4.43E-07	0.003533249	0	methyl
BP	cg09227934	0.0569739	0.0118235	4.75E-07	0.1859082	1	methyl
BP	cg08505228	-0.067315	0.0275459	4.81E-07	1.00E-05	0	methyl
BP	cg27294008	-0.106904	0.022468	4.91E-07	0.007006701	0	methyl
BP	cg02481528	-0.126522	0.0297839	5.21E-07	0.1826347	1	methyl
MD	cg23281280	-0.0370694	0.00916031	7.99E-09	7.33E-05	0	methyl
MD	cg12963246	-0.0362259	0.00894588	8.01E-09	0.000260692	0	methyl
MD	cg23892028	-0.0315365	0.00639763	9.64E-09	0.03480363	0	methyl
MD	cg26587870	0.032102	0.0145548	9.81E-09	0.02233846	0	methyl
MD	cg23161317	-0.0398822	0.00987436	1.03E-08	0.000223524	0	methyl
MD	cg19592336	-0.036754	0.00907972	1.16E-08	0.0001144	0	methyl
MD	cg26335602	-0.0506712	0.0126609	1.18E-08	0.000316605	0	methyl
MD	cg21204522	0.0357928	0.016247	1.85E-08	0.01984463	0	methyl
MD	cg22143856	-0.0437586	0.0108677	2.00E-08	0.000882944	0	methyl
MD	cg19041857	0.0332739	0.0150918	2.32E-08	0.02649817	0	methyl
MD	cg08798685	0.0198411	0.0139732	2.56E-08	0.01051243	0	methyl
MD	cg27179866	-0.0484445	0.011965	3.38E-08	0.002750283	0	methyl
MD	cg14345882	-0.0405005	0.00731155	3.93E-08	0.5683278	1	methyl
MD	cg18278486	0.0318452	0.00932753	4.10E-08	0.002099885	0	methyl
MD	cg06084579	0.0274813	0.0087314	4.22E-08	0.007380561	0	methyl
MD	cg21488066	0.0498463	0.0136821	5.03E-08	0.5004292	1	methyl
MD	cg08968635	-0.0607354	0.0153102	5.80E-08	0.000383335	0	methyl
MD	cg20151795	-0.0513211	0.0128116	5.96E-08	0.000177013	0	methyl
MD	cg07660236	0.0506892	0.0138809	6.63E-08	0.6148596	1	methyl
MD	cg03115532	-0.00981158	0.00716875	6.69E-08	0.06532605	1	methyl
MD	cg07220782	0.0458214	0.0134527	7.12E-08	0.01610804	0	methyl
MD	cg10876282	-0.0563243	0.0120191	7.45E-08	0.8134027	1	methyl
MD	cg10547057	0.0407119	0.0121004	8.04E-08	0.003158969	0	methyl
MD	cg01192291	0.106186	0.0218713	1.07E-07	0.161848	1	methyl
MD	cg11823142	-0.0259915	0.011675	1.17E-07	0.01356077	0	methyl
MD	cg22548220	-0.0677396	0.0192818	1.51E-07	0.007284895	0	methyl
MD	cg11369071	0.056669	0.0167894	1.68E-07	0.01833213	0	methyl
MD	cg01566283	0.0731833	0.018528	2.11E-07	0.002588339	0	methyl
MD	cg06781135	0.0546982	0.0162931	2.42E-07	0.01677994	0	methyl
MD	cg21438527	-0.0315198	0.0067372	2.42E-07	0.004334269	0	methyl
MD	cg06675483	0.0616734	0.0186425	2.47E-07	0.008415816	0	methyl
MD	cg12292205	0.0461575	0.0132104	2.53E-07	0.002838852	0	methyl
MD	cg26958806	-0.136484	0.0293385	2.76E-07	0.00646397	0	methyl
MD	cg11079354	-0.0695499	0.0178311	3.41E-07	0.01158222	0	methyl
MD	cg06035815	-0.0391183	0.0127899	3.89E-07	0.000426043	0	methyl
MD	cg15969227	0.0239498	0.00896681	4.12E-07	0.004179269	0	methyl
MD	cg11502198	-0.000854829	0.00709865	4.95E-07	7.56E-05	0	methyl
MD	cg18032046	0.0802572	0.0182058	5.23E-07	0.4745592	1	methyl
ADHD	cg05370662	0.0130585	0.0119059	2.93E-12	0.000467592	0	methyl
ADHD	cg04131194	-0.0509139	0.0121299	5.95E-10	0.00514735	0	methyl
ADHD	cg03753284	-0.0680762	0.0130184	9.78E-10	0.01178407	0	methyl
ADHD	cg09903430	0.0224801	0.0209557	2.60E-09	0.02148422	0	methyl
ADHD	cg12908607	0.0540653	0.0130516	3.50E-09	0.000617517	0	methyl
ADHD	cg13246856	-0.0867563	0.021244	1.46E-08	0.002227342	0	methyl
ADHD	cg05886813	-0.0171232	0.0225141	2.68E-08	0.002281345	0	methyl
ADHD	cg22617819	0.0461193	0.0142073	3.76E-08	0.000204736	0	methyl
ADHD	cg18394614	-0.0453996	0.0270434	4.99E-08	0.0569276	1	methyl
ADHD	cg13606994	0.071552	0.0179735	7.18E-08	0.000685669	0	methyl
ADHD	cg19743044	-0.0293087	0.0216121	1.36E-07	8.70E-06	0	methyl
ADHD	cg15962314	-0.0739299	0.0266068	2.94E-07	4.47E-06	0	methyl
AD	cg13375295	-0.0415335	0.00471581	2.17E-28	2.80E-45	0	methyl
AD	cg24084606	-0.139389	0.0125414	4.05E-28	3.96E-31	0	methyl
AD	cg06688803	-0.0112311	0.00185012	1.54E-20	3.93E-16	0	methyl
AD	cg02887598	-0.0115947	0.00172333	8.28E-19	5.60E-19	0	methyl
AD	cg09555818	0.00813461	0.00204928	1.04E-16	7.74E-20	0	methyl
AD	cg13119609	0.00816874	0.00205803	1.06E-16	3.43E-19	0	methyl
AD	cg06750524	0.479355	0.0625595	2.42E-15	0.003269089	0	methyl
AD	cg05644480	-0.194828	0.0241067	3.22E-15	8.97E-07	0	methyl
AD	cg15046935	-0.00843435	0.00210272	2.49E-14	9.38E-19	0	methyl
AD	cg03270332	-0.0120772	0.00303665	5.09E-14	1.14E-12	0	methyl
AD	cg01958934	0.0101427	0.00256746	8.00E-13	1.21E-17	0	methyl
AD	cg18383668	-0.0126258	0.00318002	1.19E-12	2.41E-13	0	methyl
AD	cg18774435	0.015599	0.00249671	2.15E-12	5.21E-06	0	methyl
AD	cg08168897	0.014918	0.00380839	1.71E-11	5.32E-19	0	methyl
AD	cg07180834	-0.0266823	0.00464902	2.74E-11	0.00014227	0	methyl
AD	cg16529268	-0.015949	0.0034998	3.29E-11	0.001181801	0	methyl
AD	cg10762466	-0.0940793	0.0158468	4.52E-11	1.41E-08	0	methyl
AD	cg19417129	-0.0631632	0.0100917	4.63E-11	6.17E-14	0	methyl
AD	cg00436254	0.0541703	0.00795017	8.61E-11	2.16E-10	0	methyl
AD	cg19153828	0.013895	0.00340513	9.80E-11	4.40E-06	0	methyl
AD	cg12632573	0.0144911	0.00383028	3.71E-10	9.27E-09	0	methyl
AD	cg19590598	0.0141539	0.00347268	4.72E-10	1.66E-05	0	methyl
AD	cg27405400	0.0308807	0.00774312	7.97E-10	4.18E-12	0	methyl
AD	cg06736138	0.104594	0.0145028	8.85E-10	3.29E-13	0	methyl
AD	cg02458875	0.00131931	0.00187926	1.02E-09	1.98E-06	0	methyl
AD	cg26470501	-0.061294	0.00853775	1.03E-09	1.73E-13	0	methyl
AD	cg13334819	0.0118102	0.00249566	1.16E-09	3.99E-08	0	methyl
AD	cg10169327	0.0173584	0.00449376	1.19E-09	7.88E-17	0	methyl
AD	cg19116668	0.018757	0.00243292	1.23E-09	0.2412678	1	methyl
AD	cg22906224	-0.0125716	0.0026632	1.24E-09	4.44E-07	0	methyl
AD	cg25746394	0.0326373	0.00619799	1.46E-09	6.87E-10	0	methyl
AD	cg15224348	0.00904614	0.00221727	1.61E-09	2.34E-09	0	methyl
AD	cg06673536	0.00536357	0.00397087	3.28E-09	1.34E-13	0	methyl
AD	cg18612786	-0.0222064	0.00506385	3.82E-09	0.005149505	0	methyl
AD	cg01496416	-0.0487866	0.00805712	4.68E-09	0.007891449	0	methyl
AD	cg02924836	-0.00820445	0.00253752	4.76E-09	3.49E-05	0	methyl
AD	cg17830204	0.0280901	0.00489587	6.24E-09	0.001645517	0	methyl
AD	cg05299077	-0.0242	0.00419111	6.59E-09	0.4126726	1	methyl
AD	cg18997129	0.0444129	0.00803008	9.55E-09	0.002786597	0	methyl
AD	cg06881914	-0.0604308	0.0101737	9.65E-09	0.05552924	1	methyl
AD	cg24998649	-0.0117704	0.00327818	9.96E-09	1.91E-06	0	methyl
AD	cg00553149	-0.0227353	0.0038535	1.05E-08	0.001187808	0	methyl
AD	cg05908241	0.0284248	0.00531291	1.14E-08	0.009188816	0	methyl
AD	cg00814883	-0.000883195	0.00211721	1.18E-08	0.005635038	0	methyl
AD	cg04778012	-0.0291138	0.00510035	2.26E-08	0.002346263	0	methyl
AD	cg14123992	0.247381	0.0442944	2.34E-08	2.82E-06	0	methyl
AD	cg20090143	0.0909261	0.0155483	3.20E-08	8.77E-13	0	methyl
AD	cg15140703	-0.0360838	0.00643905	3.69E-08	0.005517026	0	methyl
AD	cg10228500	0.0513749	0.00973296	3.97E-08	0.01359236	0	methyl
AD	cg04895225	0.0193754	0.00439143	4.23E-08	0.00450226	0	methyl
AD	cg22311510	0.00164561	0.00318031	4.46E-08	7.60E-09	0	methyl
AD	cg11607219	0.0067766	0.00177901	5.33E-08	0.01653879	0	methyl
AD	cg16954525	-0.000595197	0.00163633	5.50E-08	3.35E-12	0	methyl
AD	cg03265037	-0.0116926	0.00354526	6.31E-08	5.22E-05	0	methyl
AD	cg10978526	0.00683208	0.00179376	6.52E-08	0.01501162	0	methyl
AD	cg20773800	0.00432198	0.00641451	7.22E-08	0.3033175	1	methyl
AD	cg01674009	0.0398136	0.00925309	8.10E-08	2.99E-10	0	methyl
AD	cg10084644	-0.0356756	0.00651329	8.50E-08	0.001958054	0	methyl
AD	cg11107966	0.00797172	0.00194983	8.83E-08	0.01518578	0	methyl
AD	cg02637105	0.0115786	0.00483169	9.88E-08	2.45E-06	0	methyl
AD	cg18691434	-0.035052	0.00657029	1.09E-07	0.02001791	0	methyl
AD	cg19427746	0.00981323	0.00253314	1.63E-07	0.003154008	0	methyl
AD	cg08552401	0.0227178	0.00500025	1.69E-07	0.000392086	0	methyl
AD	cg20332503	-0.00849833	0.00352442	1.76E-07	1.76E-07	0	methyl
AD	cg03766620	0.0259943	0.00672065	2.04E-07	8.92E-06	0	methyl
AD	cg24329783	-0.0102176	0.00230464	2.30E-07	0.005057742	0	methyl
AD	cg06522456	-0.0328644	0.00806342	2.41E-07	0.001202159	0	methyl
AD	cg19636519	-0.0103365	0.00265846	2.62E-07	7.03E-05	0	methyl
AD	cg25228746	-0.130852	0.0298715	2.85E-07	0.000112744	0	methyl
AD	cg12968598	0.0179253	0.00321465	3.54E-07	0.162169	1	methyl
AD	cg01904978	0.0510676	0.0136133	3.66E-07	0.02332176	0	methyl
AD	cg11738421	-0.00828382	0.0043386	3.67E-07	9.02E-06	0	methyl
AD	cg18090197	0.0452806	0.00858173	3.92E-07	0.005019956	0	methyl
AD	cg02161262	0.0430517	0.0371748	4.67E-07	0.02672153	0	methyl
AD	cg02220965	0.0153882	0.00341299	4.76E-07	0.02651427	0	methyl
AD	cg19337854	-0.00281643	0.00556376	4.80E-07	8.50E-07	0	methyl
AD	cg20172563	0.0279971	0.00525254	4.89E-07	0.2036456	1	methyl
AD	cg05768032	-0.0105278	0.00252675	4.95E-07	0.02031952	0	methyl
