# Supplementary material for: A Comprehensive Evaluation of Cross-Omics Blood-Based Biomarkers for Neuropsychiatric Disorders
Source: J Pers Med. 2021 Nov 24;11(12):1247. doi: 10.3390/jpm11121247 (PMC8703948; doi:10.3390/jpm11121247)
Supplement: Supplementary file 1 [file jpm-11-01247-s001.zip › Table S3.csv]

disease	id	b	se	p	pHEIDI	filter	omic
SCZ	ITIH1.7955.195.3	0.0807874	0.0155271	9.95E-10	0.004993332	0	protein
SCZ	MLN.5631.83.3	-0.0635956	0.0206988	2.74E-08	0.003419658	0	protein
SCZ	CTSS.3181.50.2	0.0958759	0.0222981	4.76E-08	0.001777592	0	protein
SCZ	SERPING1.4479.14.2	-0.0792486	0.0179896	9.07E-08	0.000209213	0	protein
SCZ	ESAM.2981.9.3	0.289376	0.0578147	1.57E-07	0.22968	1	protein
SCZ	ESAM.7841.84.3	0.338301	0.0719108	1.48E-06	0.188825	1	protein
SCZ	GSTO1.12436.84.3	0.025932	0.010902	4.94E-05	0.01144526	0	protein
SCZ	MANBA.6382.17.3	0.0529948	0.018167	7.42E-05	0.03935179	0	protein
PD	BST1.4535.50.2	0.058495	0.0169981	1.97E-09	0.000431822	0	protein
PD	IDUA.3169.70.2	-0.0766447	0.0294255	2.76E-09	8.01E-12	0	protein
PD	SNCA.8458.111.3	-0.871959	0.135003	5.80E-09	0.000389671	0	protein
PD	SNCA.8458.16.3	-0.949197	0.155108	2.00E-08	0.000254804	0	protein
PD	GPNMB.5080.131.3	0.412606	0.0916336	3.01E-06	0.06224382	1	protein
PD	GPNMB.8240.207.3	0.44196	0.0998036	4.64E-06	0.06493134	1	protein
PD	GPNMB.8289.8.3	0.496116	0.113827	5.32E-06	0.1994916	1	protein
AN	SERPING1.4479.14.2	0.0639671	0.0249072	6.30E-06	0.000784231	0	protein
BP	ITIH1.7955.195.3	0.10707	0.0218449	7.44E-07	0.02368806	0	protein
BP	PI3.4982.54.1	-0.171462	0.0473136	5.86E-06	0.5309471	1	protein
BP	LMAN2L.8013.9.3	-0.307822	0.0626664	9.63E-06	0.5474561	1	protein
BP	FLRT3.13123.3.3	0.174847	0.0367734	1.06E-05	0.05348443	1	protein
MD	SERPING1.4479.14.2	-0.0451844	0.0149136	7.80E-06	0.000511916	0	protein
ADHD	TIE1.2844.53.2	0.296288	0.0617629	8.22E-07	0.2459346	1	protein
ADHD	MANBA.6382.17.3	-0.130817	0.0260286	4.62E-05	0.05025339	1	protein
ADHD	HP.3054.3.2	-0.00967378	0.0188791	6.45E-05	0.1327138	1	protein
AD	APOE.2937.10.2	0.122665	0.0095601	1.15E-34	7.99E-13	0	protein
AD	PSG5.9314.9.3	0.175399	0.0178965	2.82E-21	1.84E-11	0	protein
AD	APOE.5312.49.3	0.260772	0.0375207	6.86E-19	3.10E-06	0	protein
AD	CD55.5069.9.3	-0.0209409	0.00498544	5.68E-07	0.001895273	0	protein
AD	BIN1.9574.11.3	0.140726	0.0271371	3.38E-06	0.01726126	0	protein
