# Supplementary material for: A Comprehensive Evaluation of Cross-Omics Blood-Based Biomarkers for Neuropsychiatric Disorders
Source: J Pers Med. 2021 Nov 24;11(12):1247. doi: 10.3390/jpm11121247 (PMC8703948; doi:10.3390/jpm11121247)
Supplement: Supplementary file 1 [file jpm-11-01247-s001.zip › Table S4.csv]

	outcome	exposure	method	nsnp	b	se	pval
2263	PD	IL18	Inverse variance weighted	21	0.10454432	0.029896812	0.000470807
1756	MD	RANTES	Inverse variance weighted	9	0.078115201	0.022145987	0.000419845
868	ANX	IL18	Inverse variance weighted	21	-0.153468142	0.041286067	0.000201451
1155	ASD	MIP1b	Inverse variance weighted	87	0.071037743	0.014692837	1.33E-06
2062	OCD	IL18	Inverse variance weighted	21	-0.193525845	0.048258397	6.07E-05
2148	OCD	MIP1b	Inverse variance weighted	88	0.147968388	0.031723001	3.10E-06
2866	TS	IL18	Inverse variance weighted	21	0.189494814	0.037270284	3.69E-07
