# Supplementary material for: A Comprehensive Evaluation of Cross-Omics Blood-Based Biomarkers for Neuropsychiatric Disorders
Source: J Pers Med. 2021 Nov 24;11(12):1247. doi: 10.3390/jpm11121247 (PMC8703948; doi:10.3390/jpm11121247)
Supplement: Supplementary file 1 [file jpm-11-01247-s001.zip › Table S5.csv]

	outcome	exposure	method	nsnp	b	se	pval	x
1913	AN	Gp	Inverse variance weighted	31	-0.155469517	0.042177783	0.000227759	AN.Gp
2288	AN	Tyr	Inverse variance weighted	31	-0.175015108	0.046588512	0.000172227	AN.Tyr
3603	BP	Bis.DB.ratio	Inverse variance weighted	47	-0.142415581	0.029843666	1.82E-06	BP.Bis.DB.ratio
3608	BP	Bis.FA.ratio	Inverse variance weighted	50	-0.143570304	0.031767981	6.20E-06	BP.Bis.FA.ratio
3618	BP	CH2.DB.ratio	Inverse variance weighted	32	0.145076019	0.037543362	0.000111442	BP.CH2.DB.ratio
3623	BP	CH2.in.FA	Inverse variance weighted	23	0.232176869	0.04804824	1.35E-06	BP.CH2.in.FA
3638	BP	DB.in.FA	Inverse variance weighted	28	-0.169857436	0.043504149	9.45E-05	BP.DB.in.FA
3693	BP	Gly	Inverse variance weighted	94	-0.08547606	0.018233101	2.76E-06	BP.Gly
4148	BP	XS.VLDL.L	Inverse variance weighted	82	0.130713347	0.030500555	1.82E-05	BP.XS.VLDL.L
4793	MD	Bis.DB.ratio	Inverse variance weighted	47	-0.056654201	0.015497378	0.000256453	MD.Bis.DB.ratio
4798	MD	Bis.FA.ratio	Inverse variance weighted	50	-0.062824519	0.015016837	2.87E-05	MD.Bis.FA.ratio
4808	MD	CH2.DB.ratio	Inverse variance weighted	32	0.063269995	0.016869023	0.000176369	MD.CH2.DB.ratio
4828	MD	DB.in.FA	Inverse variance weighted	28	-0.089450663	0.024631391	0.0002817	MD.DB.in.FA
2468	ANX	FAw3	Inverse variance weighted	20	0.321739878	0.083843073	0.000124341	ANX.FAw3
2628	ANX	L.VLDL.CE	Inverse variance weighted	41	0.233817488	0.066108196	0.000404867	ANX.L.VLDL.CE
2933	ANX	XL.HDL.TG	Inverse variance weighted	88	0.147862045	0.04089777	0.000299877	ANX.XL.HDL.TG
2958	ANX	XS.VLDL.L	Inverse variance weighted	76	0.180770527	0.050602229	0.000353748	ANX.XS.VLDL.L
1693	ALD	Tyr	Inverse variance weighted	31	0.27735254	0.071069022	9.52E-05	ALD.Tyr
3478	ASD	Tyr	Inverse variance weighted	31	-0.156770484	0.043948433	0.00036089	ASD.Tyr
