# Supplementary material for: A Comprehensive Evaluation of Cross-Omics Blood-Based Biomarkers for Neuropsychiatric Disorders
Source: J Pers Med. 2021 Nov 24;11(12):1247. doi: 10.3390/jpm11121247 (PMC8703948; doi:10.3390/jpm11121247)
Supplement: Supplementary file 1 [file jpm-11-01247-s001.zip › Table S8.csv]

exposure	outcome	original sensitivity test	non_outliers	n_non_outliers	p_CochranQ	p_RuckerQ	p_EggerIntercept	beta_Egger	se_Egger	p_Egger	beta_WM	se_WM	p_WM	beta_IVW	se_IVW	p_IVW
Gp	AN	pass	rs10419198|rs1157652|rs11648622|rs11676235|rs11859903|rs1260326|rs13233571|rs1332095|rs152828|rs16841283|rs17410962|rs17666927|rs2000999|rs2023929|rs2068834|rs217181|rs30432|rs3739095|rs3741475|rs439968|rs444181|rs7126124|rs714052|rs7197967|rs8044335|rs811053|rs9302635|rs964184|rs984991|rs9925462|rs9938539	31	0.18601279	0.168850061	0.516604467	-0.069603458	0.137529122	0.616612524	-0.153466466	0.055234322	0.005461689	-0.155469517	0.042177783	0.000227759
Tyr	AN	pass	rs10158025|rs1037475|rs1043011|rs10787321|rs10872069|rs11642001|rs11859903|rs12446333|rs14399|rs1588918|rs1683510|rs1720041|rs1795963|rs1800759|rs217176|rs240965|rs2461507|rs310331|rs3749319|rs4381653|rs4760099|rs4788564|rs6606672|rs6912625|rs7199026|rs7649947|rs7760535|rs7979473|rs9400467|rs951453|rs9925415	31	0.230741646	0.199467919	0.705401111	-0.232774497	0.158497913	0.152698237	-0.161044592	0.064773105	0.012908346	-0.175015108	0.046588512	0.000172227
Bis.DB.ratio	BP	fail	rs7935835|rs2509984|rs1437731|rs3886950|rs17200189|rs11644601|rs17156580|rs2509963|rs7942717|rs2259606|rs3019200|rs6721288|rs4267473|rs3741259|rs754382|rs2727261|rs11230982|rs1798172|rs1791786|rs17762402|rs11228368|rs195158|rs7104849|rs2429862|rs2013326|rs4244843|rs198475|rs13375306|rs12679834|rs11231002|rs2524287|rs964184|rs628993|rs174472|rs174552|rs1692116|rs174583|rs17090735|rs17156751|rs4669…	32	0.832178258	0.928360115	0.056643347	-0.28491405	0.081188569	0.001440822	-0.166275048	0.045237913	0.00023732	-0.137043946	0.03206913	1.93E-05
Bis.FA.ratio	BP	fail	rs11687599|rs7935835|rs17200189|rs3019200|rs7942717|rs3886950|rs2509984|rs11644601|rs17156580|rs2259606|rs1675126|rs445925|rs3741259|rs754382|rs2727261|rs13263665|rs4267473|rs9888257|rs198467|rs17545182|rs1791786|rs1798172|rs11228368|rs2013326|rs4457667|rs17762402|rs12386014|rs195158|rs2429862|rs4244843|rs7104849|rs964184|rs896973|rs12679834|rs17157079|rs2524287|rs174472|rs174546|rs1692116|rs6289…	36	0.855263437	0.922494253	0.08013406	-0.283837289	0.087732716	0.002707432	-0.126598244	0.044539088	0.00447742	-0.136366942	0.031825711	1.83E-05
CH2.DB.ratio	BP	fail	rs11687599|rs7942717|rs34955778|rs1675124|rs16903125|rs2727261|rs599839|rs754382|rs4267473|rs17156580|rs7938117|rs445925|rs6498509|rs198467|rs10495|rs1791786|rs2013326|rs17762402|rs2429862|rs195158|rs7104849|rs17157079|rs1692116|rs628993|rs3825036|rs174546|rs2903922|rs4963452|rs1667351|rs530399|rs12436720|rs2908206	30	0.067472854	0.086137406	0.196616928	0.2345618	0.063766629	0.000988127	0.199401811	0.040414131	8.06E-07	0.161919957	0.032825009	8.10E-07
CH2.in.FA	BP	fail	rs3816262|rs16954697|rs34955778|rs11635811|rs395297|rs7942717|rs12285167|rs198467|rs36633|rs2429862|rs2727261|rs17762402|rs445925|rs397650|rs12552250|rs7104849|rs174546|rs6693644|rs1475519|rs6591657|rs1793602|rs4963452|rs780093	22	0.376726568	0.385699343	0.298913915	0.284325557	0.078229806	0.00165059	0.265188121	0.053670047	7.77E-07	0.212281088	0.039579968	8.17E-08
DB.in.FA	BP	fail	rs7942717|rs11687599|rs1191973|rs599839|rs11644601|rs2727261|rs10023064|rs4267473|rs445925|rs17156580|rs1783983|rs1791786|rs198467|rs2013423|rs2013326|rs2429862|rs195158|rs17762402|rs7104849|rs1692116|rs174546|rs9321515|rs2903922|rs3825036|rs4963452|rs1260326|rs12436720|rs9689165	25	0.142386901	0.266366779	0.057579356	-0.278225746	0.063383362	0.000213207	-0.218979801	0.046778447	2.85E-06	-0.171254679	0.036018788	1.99E-06
Gly	BP	pass	rs10084326|rs10120677|rs1016403|rs10164524|rs10194245|rs10200942|rs1030143|rs1031293|rs10514514|rs10804193|rs10932343|rs10932382|rs10932472|rs1094038|rs10975444|rs11863750|rs11885999|rs11970394|rs12376596|rs12478635|rs12613336|rs12621602|rs12685394|rs12694212|rs12694232|rs1291114|rs12995330|rs13192358|rs13289592|rs1470498|rs1568519|rs1657863|rs16838023|rs16839664|rs16840798|rs16845044|rs16856937|…	94	0.06555851	0.062048549	0.462345036	-0.107687391	0.035209319	0.002913487	-0.077848107	0.024989039	0.00183764	-0.08547606	0.018233101	2.76E-06
XS.VLDL.L	BP	fail	rs11882330|rs17821274|rs12912415|rs9442812|rs16940223|rs672058|rs7251213|rs480823|rs12327770|rs5744680|rs9541772|rs4971525|rs4704221|rs4809218|rs7541095|rs6944755|rs562338|rs247617|rs1868243|rs7203984|rs289744|rs2980875|rs4953023|rs508487|rs4622454|rs2159922|rs6997473|rs949790|rs2932195|rs1800777|rs7115242|rs11858473|rs2306791|rs157580|rs6544366|rs2304130|rs6874202|rs1077835|rs4971518|rs8180991|r…	71	0.060991544	0.066826985	0.240614775	0.050828069	0.075540926	0.503287002	0.090004828	0.038920718	0.0207492	0.13416346	0.027454922	1.03E-06
Bis.DB.ratio	MD	fail	rs11230982|rs2509984|rs2429862|rs174583|rs628993|rs2259606|rs2524287|rs11228368|rs4244843|rs4267473|rs2521568|rs12679834|rs1437731|rs1692116|rs17200189|rs4963452|rs1260326|rs174472|rs198475|rs13375306|rs7104849|rs754382|rs4739037|rs964184|rs7942717|rs6721288|rs2509963|rs3825036|rs2013326|rs7935835|rs1791786|rs11644601|rs11231002|rs3741259|rs3886950|rs17090735|rs3019200|rs17762402|rs17156751|rs272…	45	0.34438825	0.313627177	0.662712973	-0.059930441	0.024961891	0.020753391	-0.056113047	0.021142479	0.007953372	-0.050787738	0.013648704	0.000198383
Bis.FA.ratio	MD	pass	rs11228368|rs11644601|rs11687599|rs12386014|rs1260326|rs12679834|rs13263665|rs1667351|rs1675126|rs1692116|rs17156580|rs17156751|rs17157079|rs17200189|rs174472|rs174546|rs17545182|rs17762402|rs1791786|rs1798172|rs195158|rs198467|rs2013326|rs2068834|rs2259606|rs2361391|rs2429862|rs2509984|rs2521568|rs2524287|rs2727261|rs2903922|rs2908206|rs3019200|rs3741259|rs3825036|rs3886950|rs4244843|rs4267473|r…	50	0.129074692	0.111438538	0.761247201	-0.055121355	0.029414697	0.067032812	-0.062550438	0.02154266	0.003689444	-0.062824519	0.015016837	2.87E-05
CH2.DB.ratio	MD	pass	rs10495|rs11687599|rs12436720|rs1667351|rs1675124|rs16903125|rs1692116|rs17156580|rs17157079|rs174546|rs17762402|rs1791786|rs195158|rs198467|rs2013326|rs2429862|rs2727261|rs2903922|rs2908206|rs34955778|rs3825036|rs4267473|rs445925|rs4963452|rs530399|rs599839|rs628993|rs6498509|rs7104849|rs754382|rs7938117|rs7942717	32	0.385011365	0.349909744	0.61261346	0.077995056	0.033460958	0.026667568	0.071085319	0.024349843	0.003507804	0.063269995	0.016869023	0.000176369
DB.in.FA	MD	fail	rs2429862|rs4267473|rs445925|rs1692116|rs4963452|rs9321515|rs2903922|rs2013423|rs7104849|rs11687599|rs7942717|rs1260326|rs198467|rs10023064|rs174546|rs2013326|rs3825036|rs1791786|rs599839|rs11644601|rs17762402|rs1191973|rs2727261|rs12436720|rs195158|rs9689165|rs17156580|rs1783983	27	0.181213313	0.148302919	0.891001676	-0.074696669	0.038084884	0.061070073	-0.076786341	0.026118954	3.28E-03	-0.079097635	0.020573798	1.21E-04
FAw3	ANX	pass	rs10401969|rs10468017|rs1077835|rs11227881|rs1260326|rs16996148|rs174546|rs17827918|rs1792208|rs2304130|rs2837920|rs2980875|rs3739095|rs3741298|rs399120|rs4863658|rs6679559|rs7104849|rs7159800|rs9457343	20	0.414622201	0.367589362	0.622233122	0.205873208	0.24645384	0.4144761	0.266769177	0.117473812	0.023154116	0.321739878	0.083843073	0.000124341
L.VLDL.CE	ANX	pass	rs10401969|rs11600974|rs11607855|rs1168041|rs12067646|rs1260326|rs12646442|rs13030345|rs13233571|rs1464572|rs16996148|rs17120347|rs180360|rs2068834|rs2240466|rs2304130|rs2803244|rs2980875|rs3735964|rs3739095|rs3764261|rs3801748|rs3846662|rs439401|rs445925|rs4587594|rs4604177|rs480823|rs508487|rs5167|rs528508|rs6586891|rs6711016|rs672058|rs673548|rs6905288|rs7115242|rs7203984|rs8182472|rs964184|rs…	41	0.995257155	0.993565195	0.744505852	0.284491959	0.167952496	0.098260769	0.279628506	0.093765592	0.002861774	0.233817488	0.066108196	0.000404867
XL.HDL.TG	ANX	pass	rs10199768|rs10211084|rs10270249|rs10401969|rs1077835|rs11096689|rs11633043|rs11638718|rs11640722|rs1168041|rs11712688|rs12324517|rs12441883|rs12442723|rs12443042|rs12480887|rs12592407|rs12593008|rs12657266|rs12899324|rs12903590|rs12912415|rs1532085|rs1593453|rs166357|rs1665049|rs16940076|rs16940213|rs16940472|rs16941134|rs16970751|rs16991213|rs17001002|rs17053070|rs174568|rs17664162|rs17821159|r…	88	0.712936564	0.695751346	0.559851133	0.104916616	0.083997143	0.215035997	0.209506756	0.065448772	0.001369135	0.147862045	0.04089777	0.000299877
XS.VLDL.L	ANX	pass	rs10401969|rs10468017|rs1077835|rs11096689|rs11206510|rs11208004|rs1168041|rs11685356|rs11858473|rs11882330|rs12327770|rs12441883|rs1260326|rs12679834|rs12912415|rs12972963|rs13358429|rs13387827|rs1367117|rs157580|rs16940223|rs16996148|rs17001002|rs1711050|rs17821274|rs1800777|rs1868243|rs1973688|rs2017566|rs2075650|rs2159922|rs2259816|rs2304130|rs2306791|rs247617|rs2704188|rs289744|rs2932195|rs2…	76	0.739758752	0.711969276	0.95558882	0.173341493	0.142253041	0.226888147	0.165341926	0.080193194	0.039227259	0.180770527	0.050602229	0.000353748
Tyr	ALD	pass	rs10158025|rs1037475|rs1043011|rs10787321|rs10872069|rs11642001|rs11859903|rs12446333|rs14399|rs1588918|rs1683510|rs1720041|rs1795963|rs1800759|rs217176|rs240965|rs2461507|rs310331|rs3749319|rs4381653|rs4760099|rs4788564|rs6606672|rs6912625|rs7199026|rs7649947|rs7760535|rs7979473|rs9400467|rs951453|rs9925415	31	0.741266459	0.869001983	0.056731385	0.725548638	0.236764017	0.004679375	0.335981894	0.102790124	0.001080732	0.27735254	0.071069022	9.52E-05
Tyr	ASD	fail	rs10158025|rs1037475|rs1043011|rs10787321|rs10872069|rs11642001|rs11859903|rs12446333|rs14399|rs1588918|rs1683510|rs1720041|rs1795963|rs1800759|rs217176|rs240965|rs2461507|rs310331|rs3749319|rs4381653|rs4760099|rs4788564|rs6606672|rs6912625|rs7199026|rs7649947|rs7760535|rs7979473|rs9400467|rs951453|rs9925415	31	0.441733181	0.655365078	0.032665302	-0.472374019	0.147274836	0.003256013	-0.140397426	0.062563512	0.024827358	-0.156770484	0.043948433	0.00036089
Bis.DB.ratio	EPI	pass	rs11228368|rs12679834|rs13375306|rs1437731|rs1675126|rs17090735|rs17156580|rs17156751|rs17157079|rs174583|rs1791786|rs1798172|rs198475|rs2013326|rs2259606|rs3019200|rs34955778|rs3781974|rs3886950|rs4244843|rs4267473|rs466998|rs4739037|rs4963243|rs7104849|rs754382|rs780093|rs882169|rs964184|rs972354	30	0.59413453	0.548893611	0.706761774	0.015134894	0.005949479	0.016765799	0.014188274	0.004737468	0.002745292	0.01330181	0.003483495	0.000134252
Bis.FA.ratio	EPI	pass	rs11228368|rs11231002|rs12386014|rs12679834|rs1430358|rs1667351|rs1675126|rs17156580|rs17156751|rs174546|rs17545182|rs1791786|rs1798172|rs198475|rs2013326|rs2259606|rs2361391|rs3019200|rs34955778|rs3781974|rs3886950|rs4244843|rs4267473|rs4457667|rs4963243|rs7104849|rs7111999|rs754382|rs780093|rs882169|rs964184|rs972354|rs9888257	33	0.673385601	0.680154559	0.307208679	0.021339748	0.006520686	0.002618468	0.016203796	0.005352865	0.002468914	0.015698254	0.003604404	1.33E-05
DB.in.FA	EPI	pass	rs10023064|rs1191973|rs17156580|rs174546|rs1783983|rs1791786|rs2013326|rs34955778|rs3781974|rs4267473|rs4963243|rs599839|rs7104849|rs9321515|rs972354	15	0.976632341	0.961281797	0.933993821	0.021059973	0.008558796	0.028635395	0.019569708	0.006378624	0.002154864	0.020471524	0.004968621	3.79E-05
IL18	PD	fail	rs693918|rs2073316|rs11951414|rs4952220|rs8101605|rs7561519|rs5744256|rs10224003|rs4952244|rs3828775|rs385076|rs1979967|rs11124272|rs176403|rs2710606|rs11700536|rs4423955|rs2091289|rs4482818|rs1540074|rs2349420	20	0.229210947	0.342814808	0.097603984	0.275796758	0.098334877	0.011718872	0.142387932	3.56E-02	6.29E-05	0.110713752	2.87E-02	0.000116078
RANTES	MD	pass	rs10505135|rs13381196|rs17044373|rs2251660|rs2731672|rs3826404|rs8050463|rs818452|rs9675798	9	0.995550035	0.988982694	0.889414133	0.069085015	0.066427424	0.332919232	0.080028537	0.028310523	0.004701387	0.078115201	0.022145987	0.000419845
IL18	ANX	pass	rs10224003|rs11124272|rs11700536|rs11951414|rs1540074|rs176403|rs1979967|rs2073316|rs2091289|rs2349420|rs2710606|rs3828775|rs385076|rs4423955|rs4482818|rs4952220|rs4952244|rs5744256|rs693918|rs7561519|rs8101605	21	0.31292515	0.384595312	0.152843045	-0.352997999	0.13985072	0.020661639	-0.194733711	0.053771971	0.000292931	-0.153468142	0.041286067	0.000201451
MIP1b	ASD	pass	rs1015164|rs1024626|rs1034383|rs10445389|rs10491120|rs11080277|rs11130043|rs11263782|rs11652913|rs11653803|rs11656872|rs11713015|rs11713101|rs11869333|rs12450862|rs12452009|rs12486033|rs12601380|rs12601721|rs12630101|rs12941140|rs12944858|rs12951603|rs13089543|rs146891|rs1491962|rs1520484|rs1520485|rs1564760|rs164639|rs17078346|rs17138331|rs17548645|rs17693183|rs1875103|rs1994089|rs211993|rs21598…	87	0.05707306	0.083174988	0.071499244	0.019158475	0.031909123	0.549832227	0.030008643	0.022169059	0.175855319	0.071037743	0.014692837	1.33E-06
IL18	OCD	pass	rs10224003|rs11124272|rs11700536|rs11951414|rs1540074|rs176403|rs1979967|rs2073316|rs2091289|rs2349420|rs2710606|rs3828775|rs385076|rs4423955|rs4482818|rs4952220|rs4952244|rs5744256|rs693918|rs7561519|rs8101605	21	0.930278955	0.921968214	0.484501546	-0.306569415	0.165724686	0.079948619	-0.183932081	0.065026268	0.004675484	-0.193525845	0.048258397	6.07E-05
MIP1b	OCD	pass	rs1015164|rs1024626|rs1034383|rs10445389|rs10491120|rs11080277|rs11130043|rs11263782|rs11652913|rs11653803|rs11656872|rs11713015|rs11713101|rs11869333|rs12450862|rs12452009|rs12486033|rs12601380|rs12601721|rs12630101|rs12941140|rs12944858|rs12951603|rs13089543|rs146891|rs1491962|rs1520484|rs1520485|rs1564760|rs164639|rs17078346|rs17138331|rs17138374|rs17548645|rs17693183|rs1875103|rs1994089|rs211…	88	0.566038795	0.597976173	0.157544939	0.059905997	0.069433863	0.390659278	0.171547401	0.053180346	0.001256356	0.147968388	0.031723001	3.10E-06
IL18	TS	pass	rs10224003|rs11124272|rs11700536|rs11951414|rs1540074|rs176403|rs1979967|rs2073316|rs2091289|rs2349420|rs2710606|rs3828775|rs385076|rs4423955|rs4482818|rs4952220|rs4952244|rs5744256|rs693918|rs7561519|rs8101605	21	0.471462424	0.443375733	0.460501578	0.096819137	0.128607418	0.4607805	0.232709305	0.052887095	1.08E-05	0.189494814	0.037270284	3.69E-07
