# Supplementary material for: A Comprehensive Evaluation of Cross-Omics Blood-Based Biomarkers for Neuropsychiatric Disorders
Source: J Pers Med. 2021 Nov 24;11(12):1247. doi: 10.3390/jpm11121247 (PMC8703948; doi:10.3390/jpm11121247)
Supplement: Supplementary file 1 [file jpm-11-01247-s001.zip › Table S10.xlsx]

## Sheet: significance
RNA			N.significant				log likelihood ratio
	disease	N.marker	aplus	aminus	bplus	bminus	aplus	aminus	bplus	bminus
	BP	9	1+2	2+3	0+0	1+0	73.14	114.31	9	13
	ASD	2	NA	1+0	NA	0+0	NA	6.98	NA	0.5
	AD	8	0+0	0+0	0+0	1+0	5.07	1.71	6.24	7.1
	PD	6	0+0	2+0	2+0	1+0	7.5	14.23	14.91	12.77
	SCZ	25	4+0	1+0	0+0	0+0	43.72	30.97	23.9	10.84
	MD	7	1+0	0+0			10.42	5.93
methylation	BP	5	0+0	0+0	0+0	0+0	7.84	1.18	6.13	5.34
	MD	7	0+0	0+0	0+0	0+0	2.99	3.83	5.57	1.45
	SCZ	281	19+0	23+0	54+3	47+1	284.58	427.18	541.21	538.57
	AD	6	3+1	1+1	0+1	0+0	26.16	20.48	11.12	2.29
	PD	14	0+3	2+2	2+0	3+1	78.58	137.34	23.75	50.16
	AN	4	0+0	0+0			10.22	4.61
aplus and aminus: result for HEIDI(+) abd HEIDI(-) markers in the larger data. Bplus and bminus indicated those in the smaller data.
number of significant markers (N.significant) was shown as N. p<0.05 + N.p-adjust<0.05.
