# Supplementary material for: A Comprehensive Evaluation of Cross-Omics Blood-Based Biomarkers for Neuropsychiatric Disorders
Source: J Pers Med. 2021 Nov 24;11(12):1247. doi: 10.3390/jpm11121247 (PMC8703948; doi:10.3390/jpm11121247)
Supplement: Supplementary file 1 [file jpm-11-01247-s001.zip › Table S11.csv]

	RNA	meth	protein	cytokine	metabolite
SCZ	BTN3A2|H2BC5|ZKSCAN4|ZSCAN26|ZSCAN16|BTN2A2|BTN2A1|PRSS16|H2BC12|ZSCAN9|H4C8|HMGN4|NA|ZKSCAN3|HCG11|NA|NA|PGBD1|CMAHP|ZNF391|BTN3A1|NA|ACTR5|DPYD|SMDT1|ZNF165|NA|KLC1|BAK1|CYP2D6|NAGA|ITPR3|ATP5MD|MAD1L1|BTN2A3P|FTCDNL1|ITIH4|ABCB9|NA|BORCS7|PHETA2|TDRD9|ABT1|SLC17A3|SNX19|AS3MT|MRM2|KMT5A|SFXN2|GLYCTK|CYP2D7|NA|ANKRD44-AS1|ARL6IP4|PPP1R16B|GPN3|XRCC3|NT5DC2|PPM1M|NA|NA|MFSD13A|SPATS2L|TEF|CKB|ZN…	cg21438527|cg23892028|cg14345882|cg18278486|cg26587870|cg23161317|cg12963246|cg21204522|cg19041857|cg06084579|cg19592336|cg10547057|cg08798685|cg27179866|cg23281280|cg07220782|cg22143856|cg06035815|cg10876282|cg06781135|cg11823142|cg22548220|cg21488066|cg07660236|cg11369071|cg11502198|cg26336265|cg08968635|cg20151795|cg26335602|cg12315302|cg12292205|cg01192291|cg15969227|cg06675483|cg07011110|cg0…	ITIH1.7955.195.3|MLN.5631.83.3|CTSS.3181.50.2|SERPING1.4479.14.2|ESAM.2981.9.3|ESAM.7841.84.3|GSTO1.12436.84.3|MANBA.6382.17.3	\	\
PD	LRRC37A2|NA|KANSL1-AS1|NA|NA|NA|ARL17A|WNT3|NA|MMRN1|BST1|IDUA|SNCA|KANSL1|NA|FAM200B|KAT8|DGKQ|NA|NUP42|GPNMB|NA|NSF|NA|STX4|NA|SETD1A|ZNF668|NA|BCKDK|NA|IGSF9B|ITGAX|PLEKHM1|KLHL7|NA|FBXL5|NA|RNF40|NA|PRR14|NAAA|PRSS36|ARHGAP27|NA|TMEM175|NA|SCARB2|SLC26A1|NA|HSD3B7|LINC02210|MAPK3|VKORC1|NDUFAF2|STBD1|ITGAD|THBS3|MUC1|PCGF3|STK39|NA|BCL7C|NUCKS1|LRRC37A	cg27060340|cg22968622|cg00846647|cg05159804|cg16228356|cg18228076|cg17117718|cg19832721|cg08113562|cg02228913|cg07368061|cg24801230|cg18878992|cg09764761|cg21705961|cg00891649|cg15295732|cg23762722|cg24477401|cg13133387|cg01934064|cg01882395|cg16520312|cg01966878|cg05301556|cg08670715|cg03954353|cg05727186|cg09279566|cg15105011|cg02070118|cg14202850|cg18586891|cg02665463|cg11936536|cg20814179|cg2…	BST1.4535.50.2|IDUA.3169.70.2|SNCA.8458.111.3|SNCA.8458.16.3|GPNMB.5080.131.3|GPNMB.8240.207.3|GPNMB.8289.8.3	IL18	\
AN	WDR6|SLC26A6|CELSR3|KLHDC8B|APEH|IP6K2|AMT|ATRIP|RBM6|UBA7|NCKIPSD|CADM1|P4HTM|HYAL3|ARIH2|MGMT|IMPDH2|CCDC71|MON1A|DAG1|PRKAR2A|LAMB2|COL7A1|LINC00324|PRKAR2A-AS1|MST1|CTC1|PSME4|QRICH1|TREX1|NA	cg14798641|cg05126514|cg00383909|cg13063704|cg06313718|cg05785598|cg07308293|cg07274523|cg21612339|cg21444500|cg05767306|cg16323609|cg01304814|cg19472611|cg19095143|cg04055981	SERPING1.4479.14.2	\	Gp|Tyr
BP	TRANK1|ITIH4|PI3|NT5DC2|NA|LRRFIP2|PPM1M|GLYCTK|SPCS1|GNL3|LOC101929054|SEMG1|GLT8D1|YJEFN3|ITIH3|LRFN4|GSDMA|CTSF|MRPS33|STIMATE|NA|RFXANK|NA|ADD3|CACNB3|PLAAT3|LRRC57|PACS1|MCHR1|TSSK6|GATAD2A|ITGA9|TOP3B|SMARCE1	cg03885818|cg14470998|cg25643088|cg11645453|cg06302806|cg20735041|cg14092988|cg06407657|cg05393861|cg27176129|cg18404041|cg17372223|cg22237644|cg18487916|cg22866937|cg07507251|cg16667508|cg16640973|cg10802521|cg09227934|cg08505228|cg27294008|cg02481528	ITIH1.7955.195.3|PI3.4982.54.1|LMAN2L.8013.9.3|FLRT3.13123.3.3	\	Bis.DB.ratio|Bis.FA.ratio|CH2.DB.ratio|CH2.in.FA|DB.in.FA|Gly|XS.VLDL.L
MD	ZKSCAN4|ZSCAN16|PRSS16|ZNF165|NA|NEGR1|PGBD1|NA|ZSCAN26|ZSCAN9|NA|NA|ZNF391|H2BC12|ZKSCAN3|BTN2A2|BTN3A2|POLI|HCG11|BTN2A1|NA	cg23281280|cg12963246|cg23892028|cg26587870|cg23161317|cg19592336|cg26335602|cg21204522|cg22143856|cg19041857|cg08798685|cg27179866|cg14345882|cg18278486|cg06084579|cg21488066|cg08968635|cg20151795|cg07660236|cg03115532|cg07220782|cg10876282|cg10547057|cg01192291|cg11823142|cg22548220|cg11369071|cg01566283|cg06781135|cg21438527|cg06675483|cg12292205|cg26958806|cg11079354|cg06035815|cg15969227|cg1…	SERPING1.4479.14.2	RANTES	Bis.DB.ratio|Bis.FA.ratio|CH2.DB.ratio|DB.in.FA
ADHD	MED8|CCDC24|ATP6V0B|TMEM161B-AS1|MPL|ELOVL1|NA|RMI1|HYAL3|NA	cg05370662|cg04131194|cg03753284|cg09903430|cg12908607|cg13246856|cg05886813|cg22617819|cg18394614|cg13606994|cg19743044|cg15962314	TIE1.2844.53.2|MANBA.6382.17.3|HP.3054.3.2	\	\
AD	NECTIN2|CEACAM19|TRAPPC6A|BIN1|MS4A6A|MS4A4A|MS4A2|PILRB|TCN1|PVR|EPHA1-AS1|SLC24A4|PVRIG|FCER1G|EPHA1|GAL3ST4|TAS2R60|AP4M1|VASP|CASTOR3|ZYX|MAPK3|NDUFS2|TRIM4|EPHX2|COPS6|EPHB4|NA|LAMTOR4|PILRA|STAG3|ITGAX|CNPY4|BCKDK|NA|STX4|ZNF668|KAT8|ZCWPW1|GNGT2|BCL3|C7orf61|CSTF1|ZKSCAN1|CEACAM22P|MEPCE|NA|RNF40|FAM131B|RIN3|TOMM40L|NA|NA|NA|MINDY2|B4GALT3|SETD1A|PHOSPHO1|HSD3B7|MAP11|CR1L|TSC22D4|USF1|UF…	cg13375295|cg24084606|cg06688803|cg02887598|cg09555818|cg13119609|cg06750524|cg05644480|cg15046935|cg03270332|cg01958934|cg18383668|cg18774435|cg08168897|cg07180834|cg16529268|cg10762466|cg19417129|cg00436254|cg19153828|cg12632573|cg19590598|cg27405400|cg06736138|cg02458875|cg26470501|cg13334819|cg10169327|cg19116668|cg22906224|cg25746394|cg15224348|cg06673536|cg18612786|cg01496416|cg02924836|cg1…	APOE.2937.10.2|PSG5.9314.9.3|APOE.5312.49.3|CD55.5069.9.3|BIN1.9574.11.3	\	\
ANX	\	\	\	IL18	FAw3|L.VLDL.CE|XL.HDL.TG|XS.VLDL.L
ALD	\	\	\	\	Tyr
ASD	XRN2|KIZ	\	\	MIP1b	Tyr
OCD	\	\	\	IL18|MIP1b	\
TS	\	\	\	IL18	\
ND	\	\	\	\	\
PTSD	\	\	\	\	\
